# Supplementary material for: Synthesis of thiourea-tethered C-glycosyl amino acids via isothiocyanate–amine coupling
Source: Royal Society of Chemistry journal article supplement (doi:10.1039/b908156a), 2009-01-01

# **Synthesis of Thiourea-Tethered C-Glycosyl Amino Acids by Isothiocyanate-Amine Coupling**

Reham F. Barghash, Alessandro Massi,<sup>\*</sup> and Alessandro Dondoni<sup>\*</sup>

<sup>†</sup>*Dipartimento di Chimica, Laboratorio di Chimica Organica,  
Università di Ferrara, Via L. Borsari 46, 44100 Ferrara, Italy*

[adn@unife.it](mailto:adn@unife.it); [msslsn@unife.it](mailto:msslsn@unife.it)

**Supporting Information**

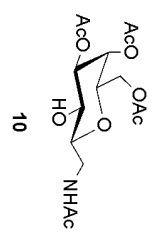

CDCl<sub>3</sub>, 300 MHz

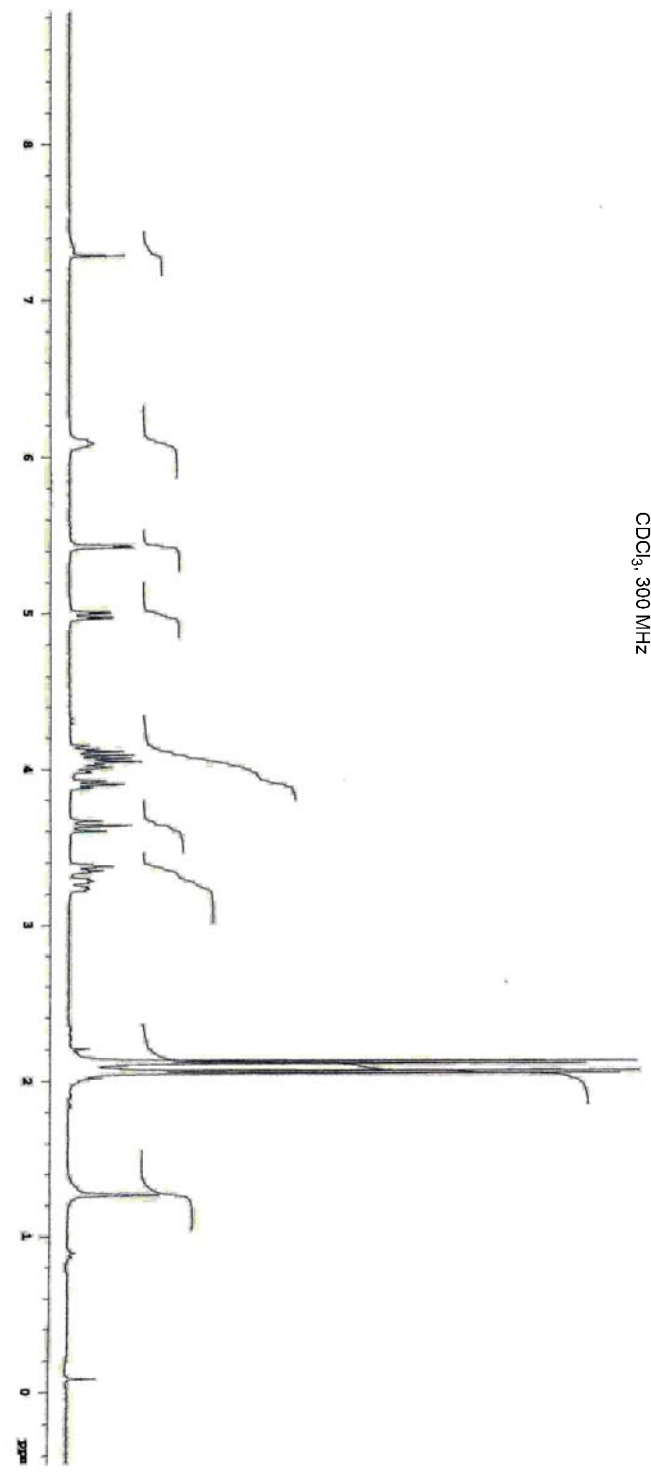

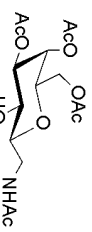

10

CDCl<sub>3</sub>, 75 MHz

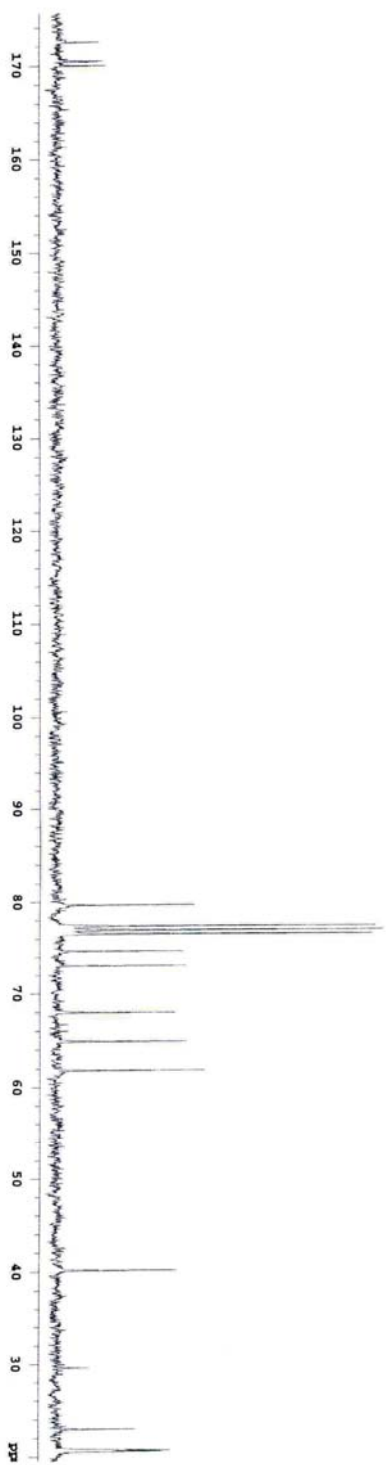

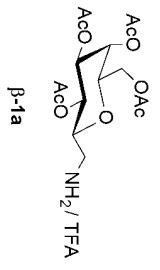

CDCl<sub>3</sub>, 300 MHz

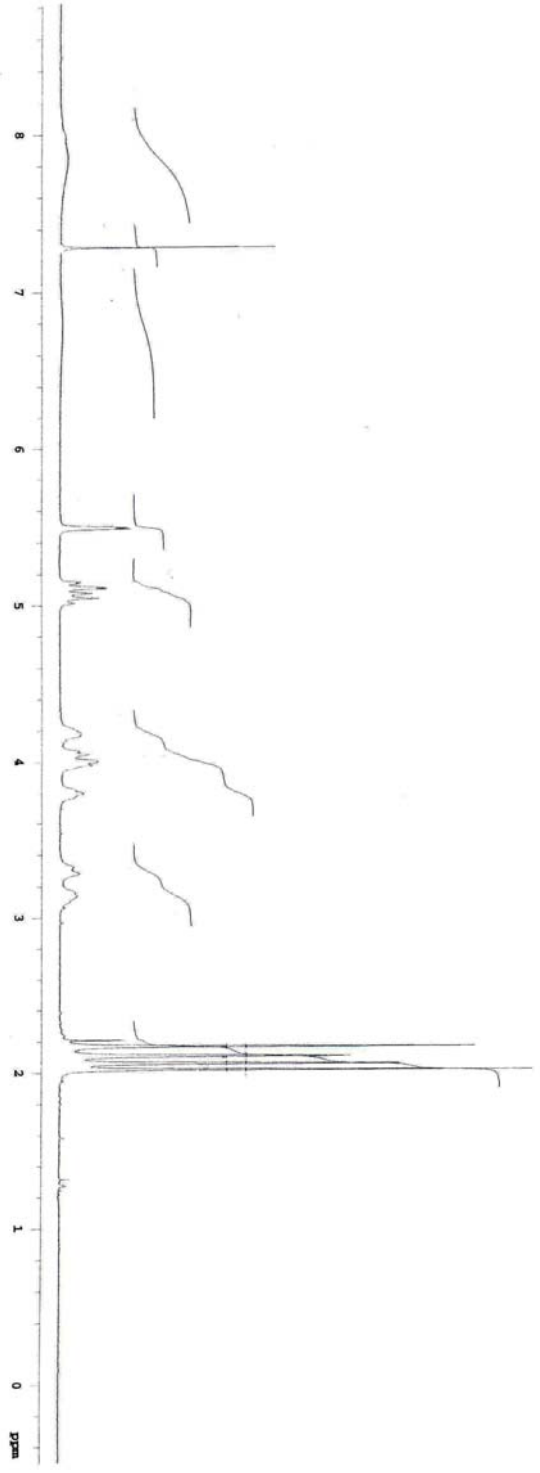

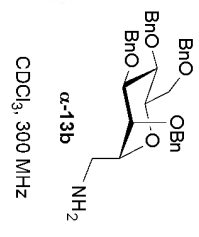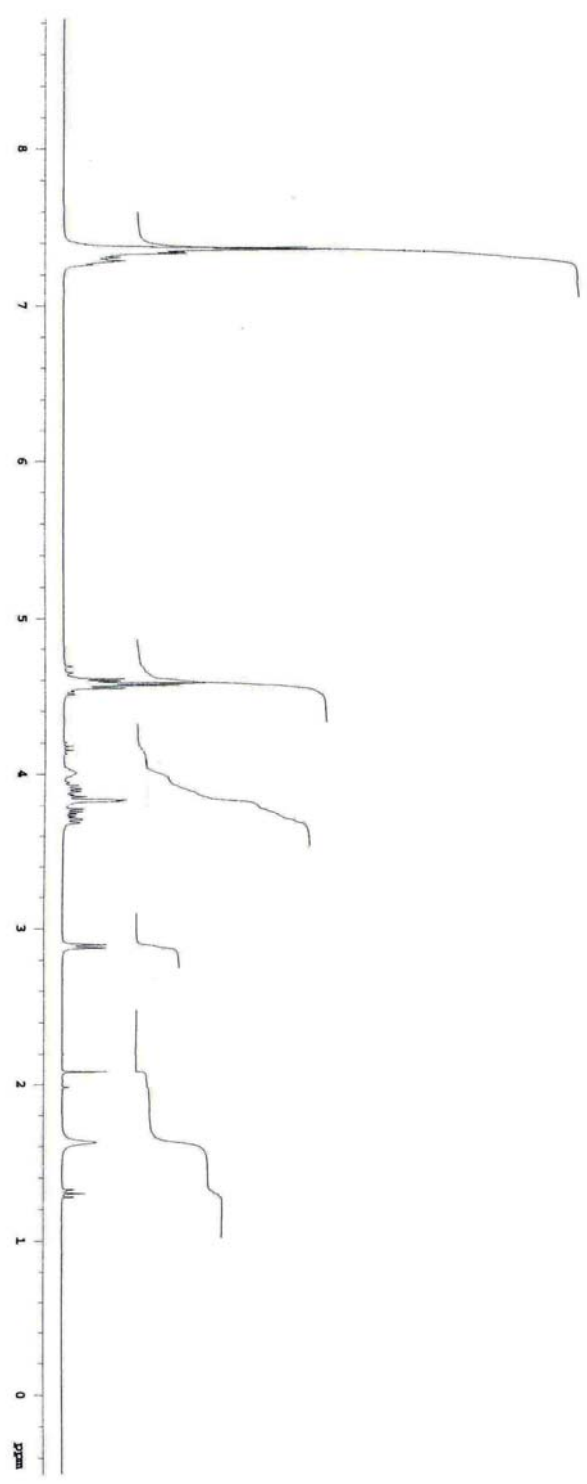

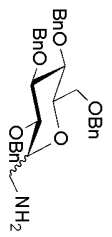

$\text{CDCl}_3$ , 300 MHz

$\alpha, \beta$ -13c

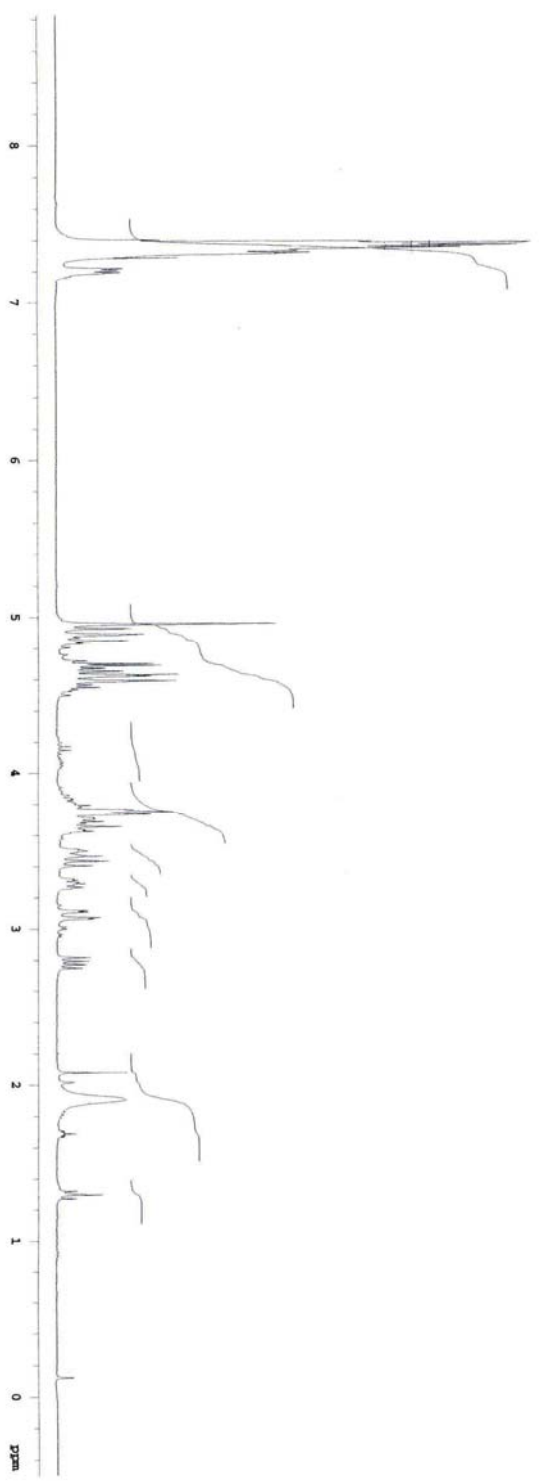

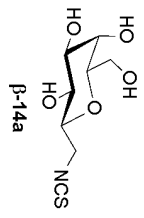

D<sub>2</sub>O, 300 MHz

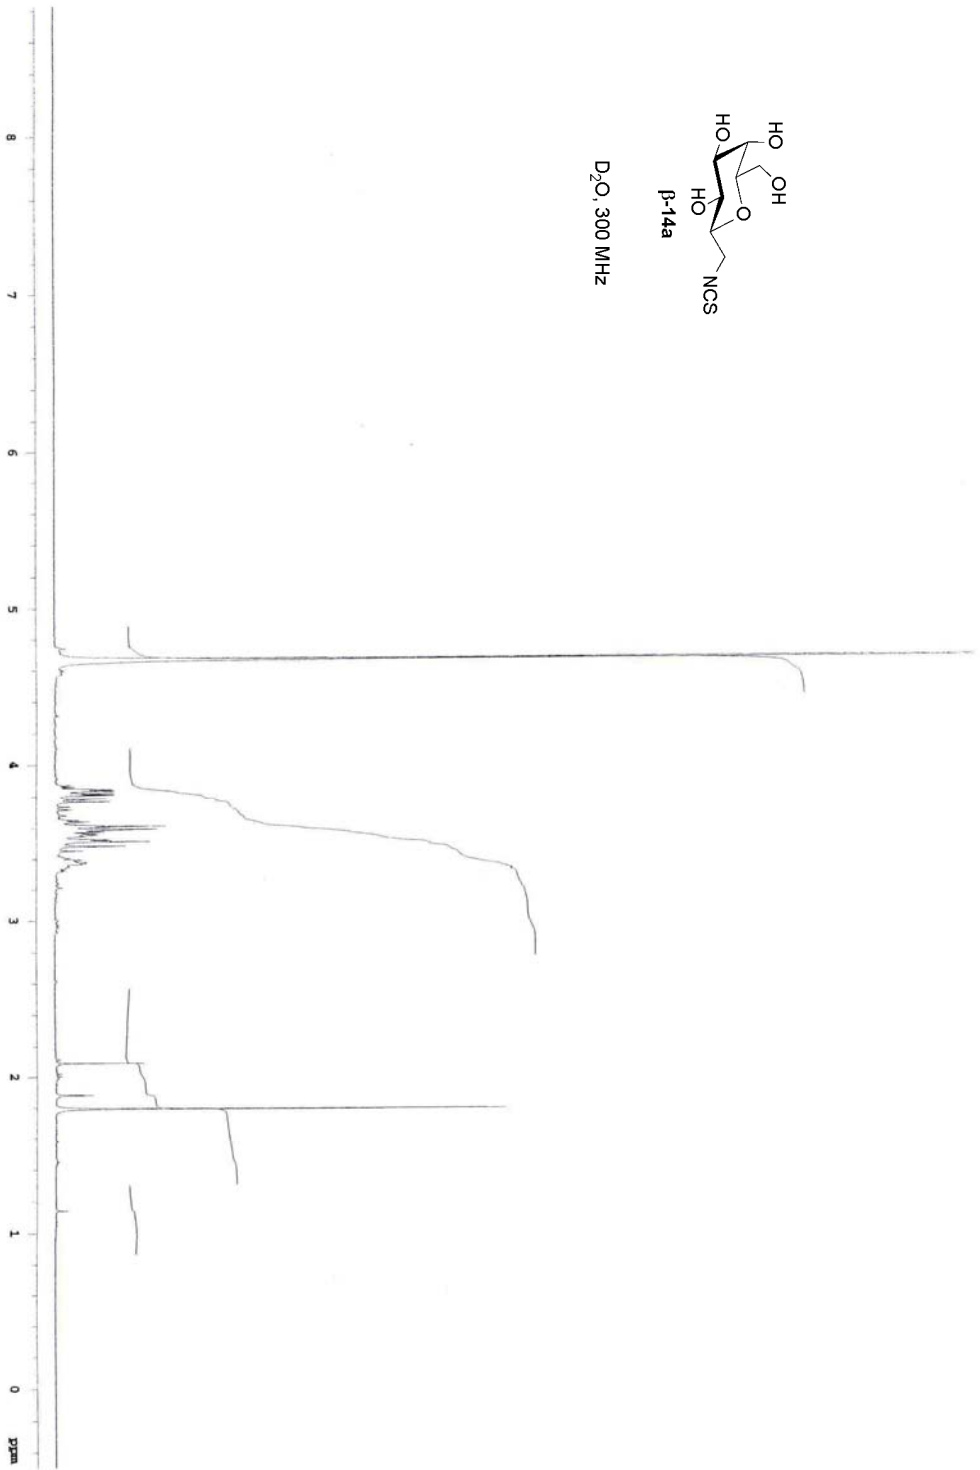

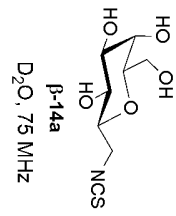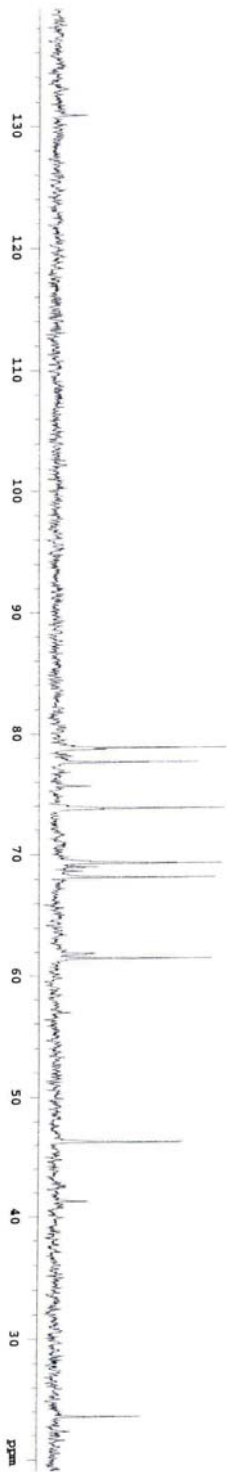



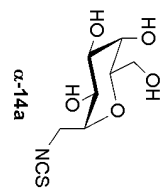

D<sub>2</sub>O, 300 MHz

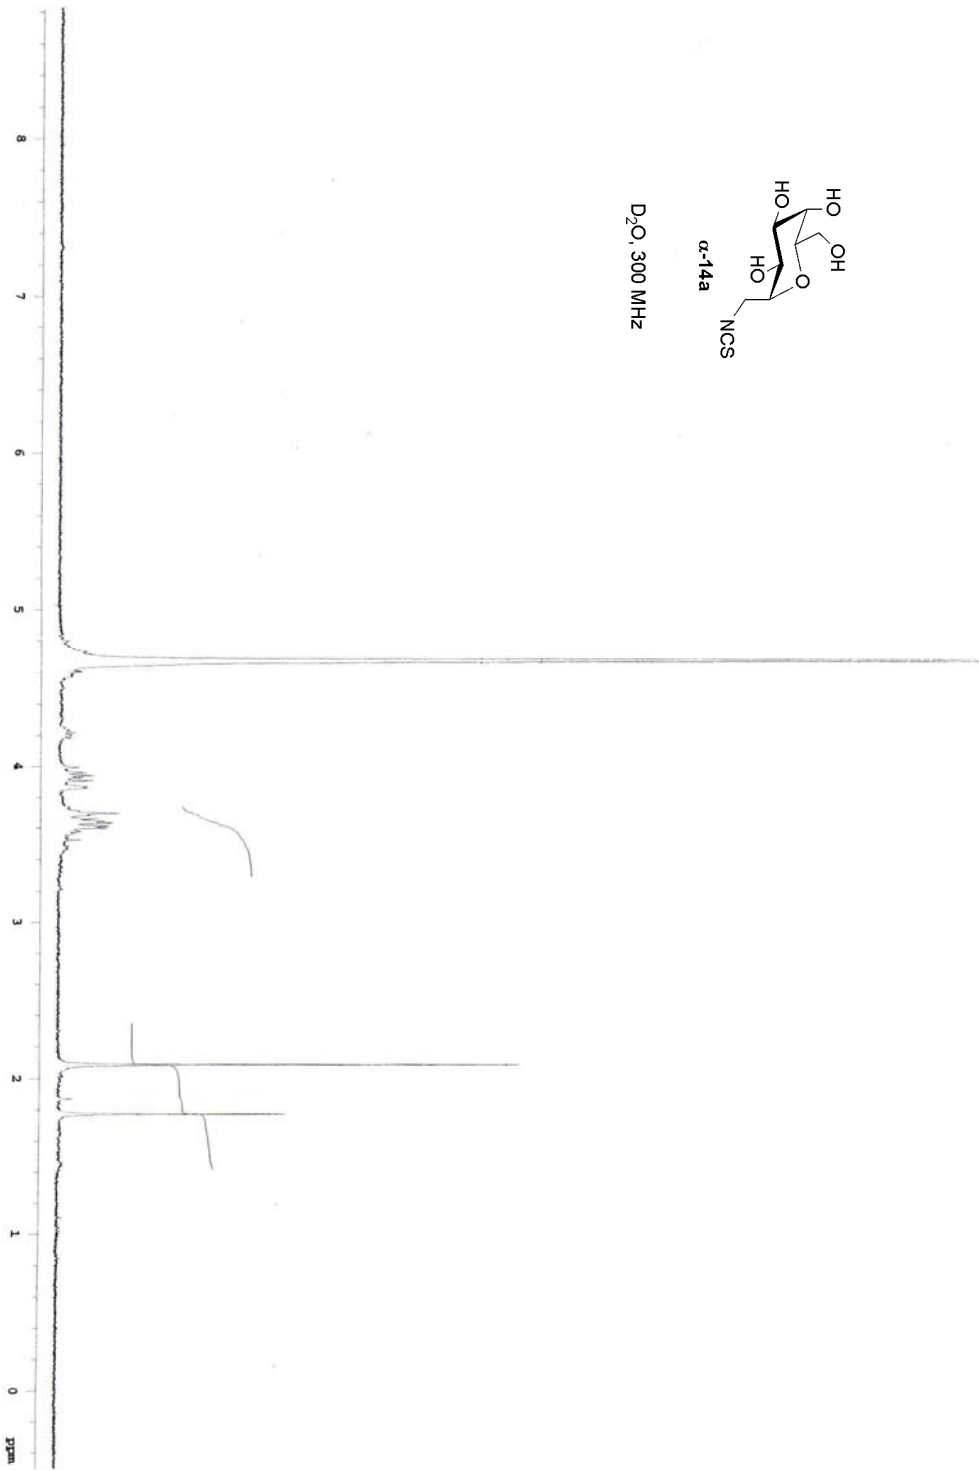

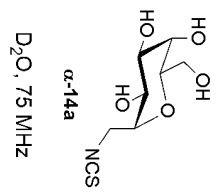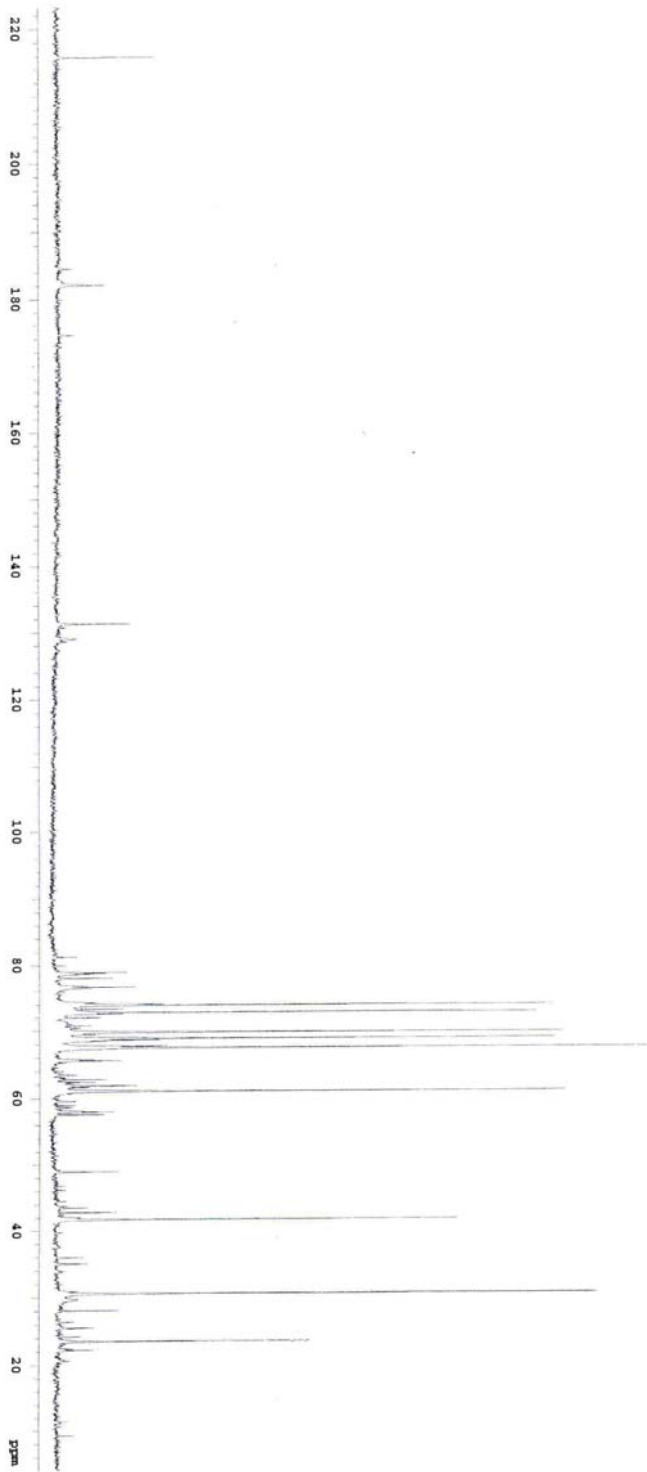

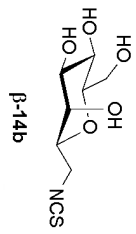

D<sub>2</sub>O, 300 MHz

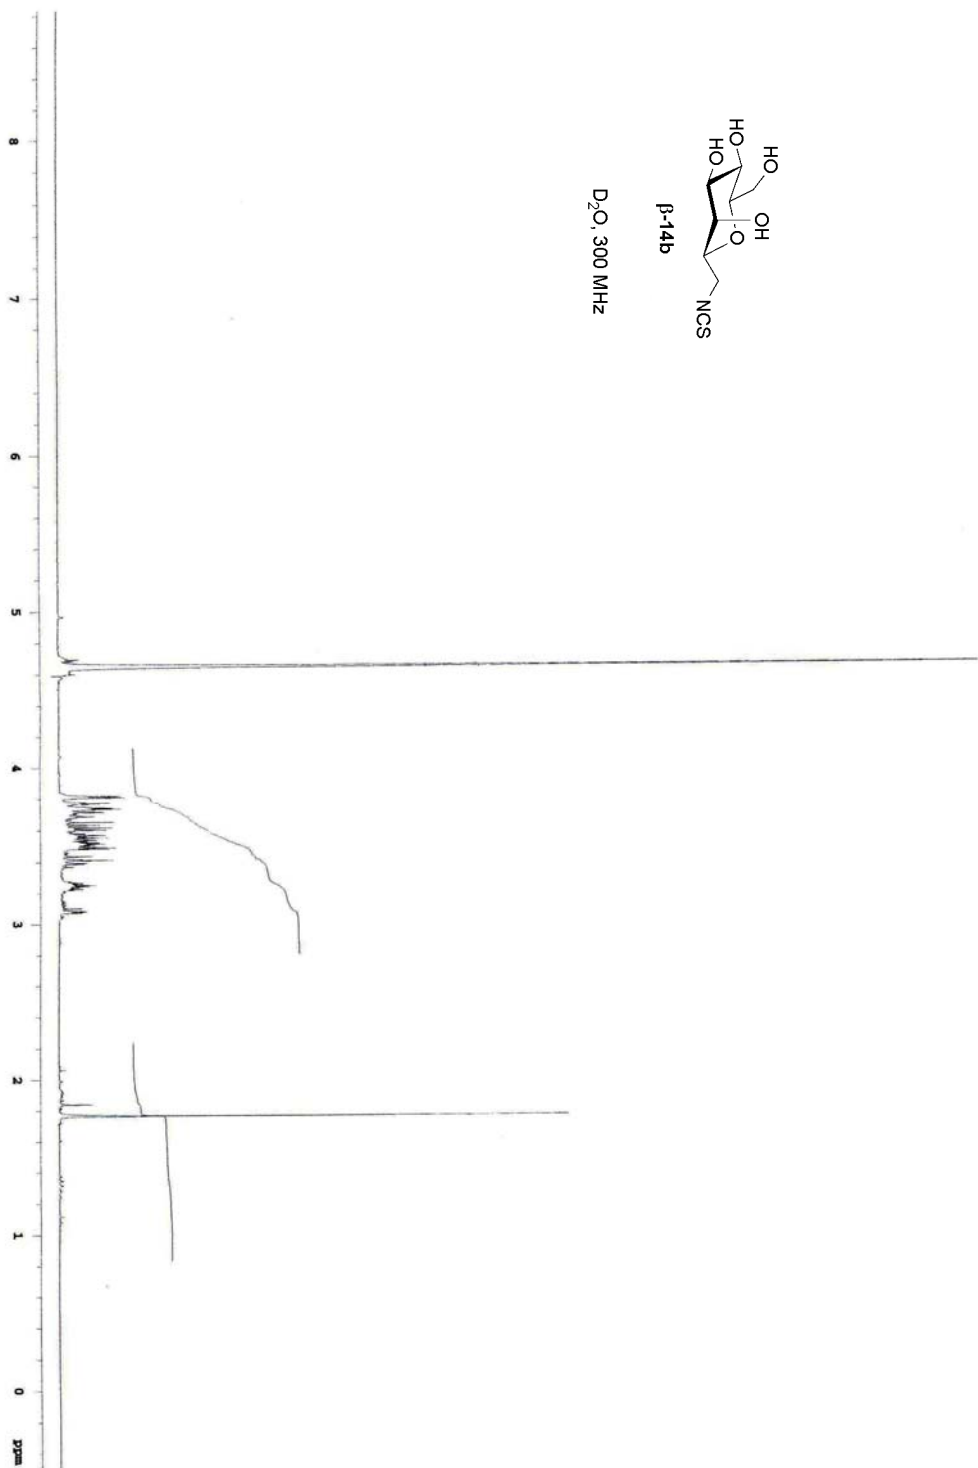

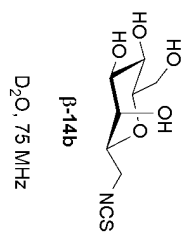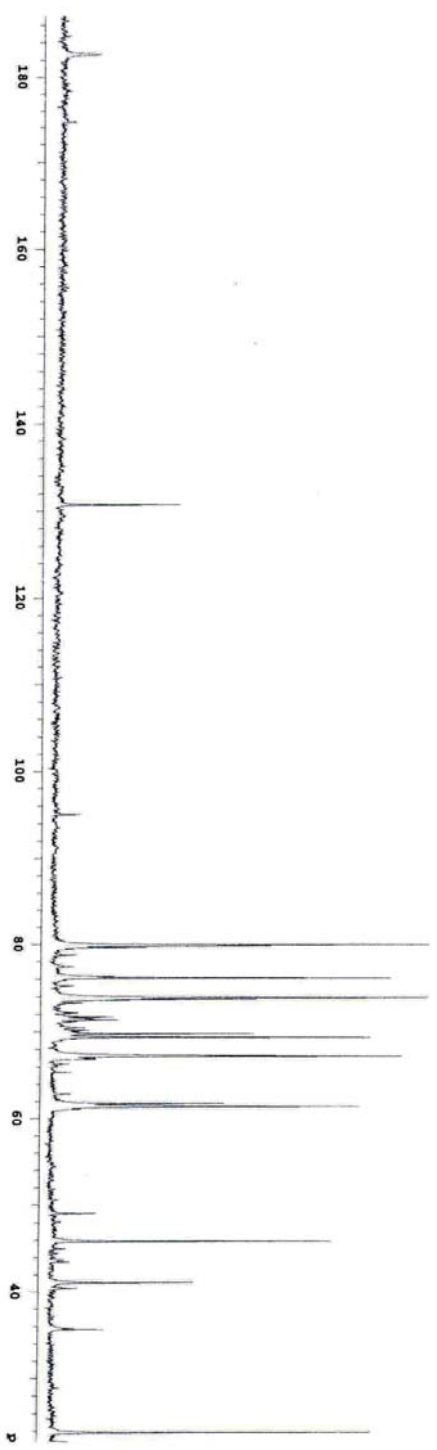

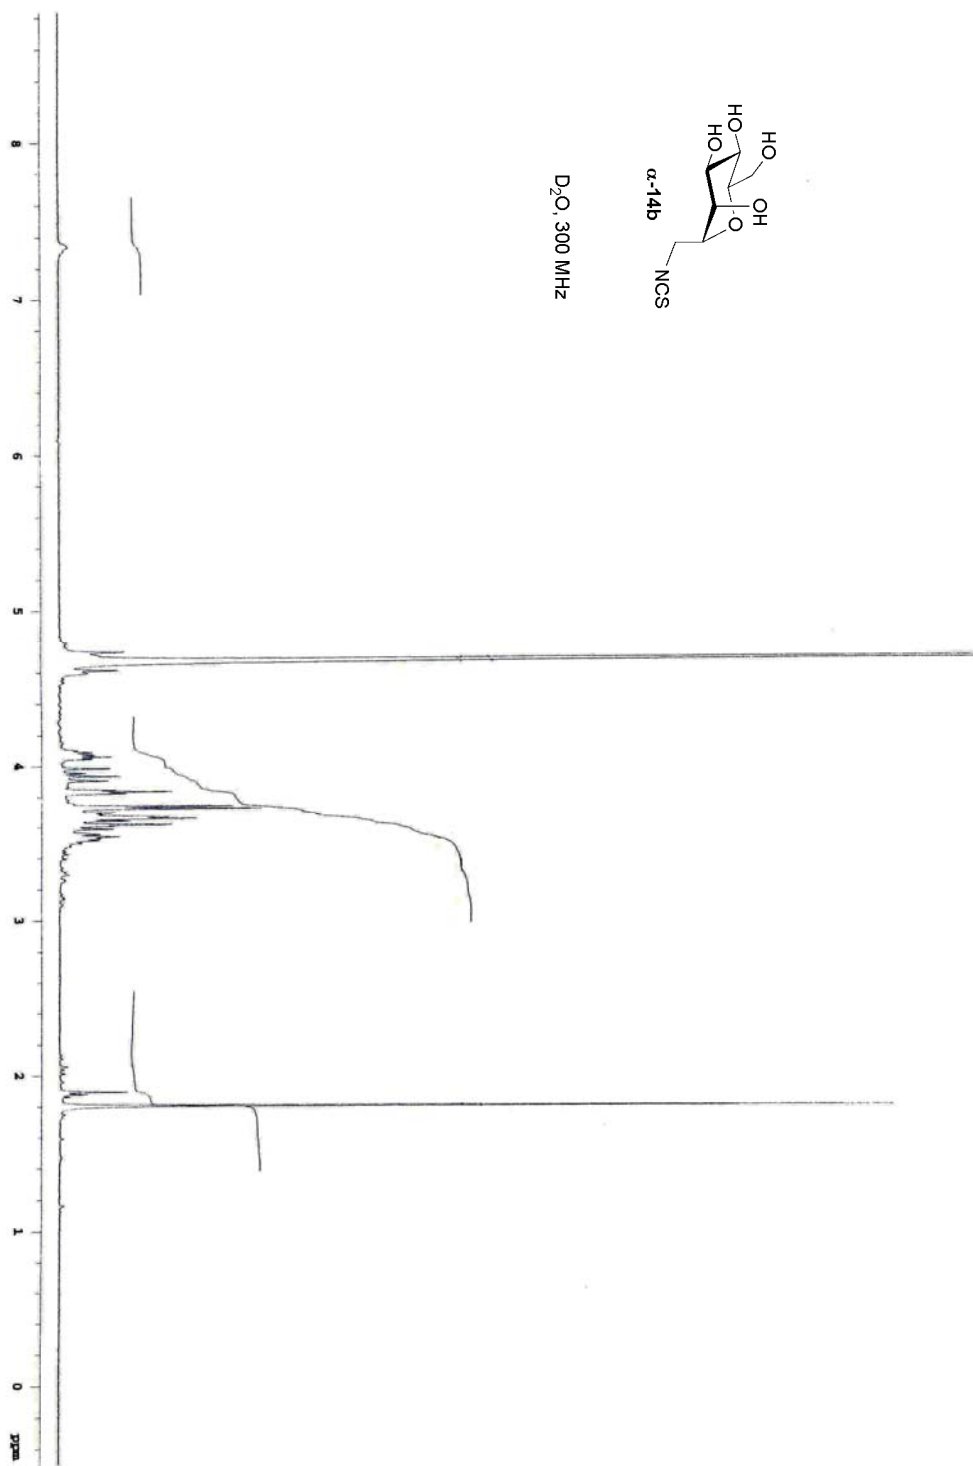

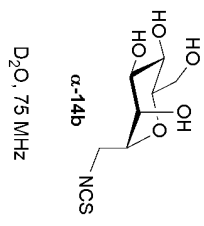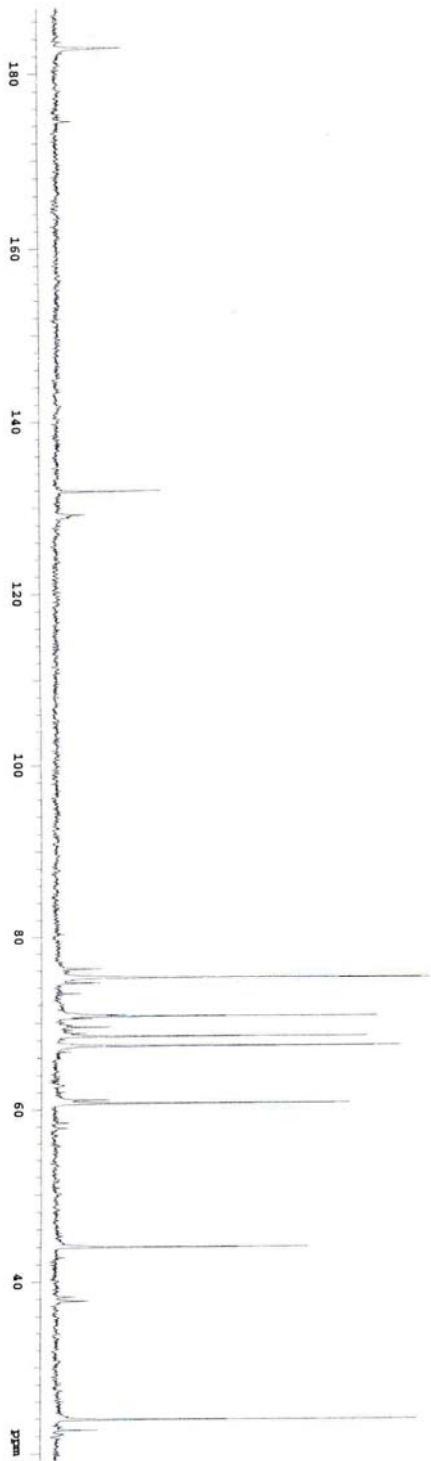

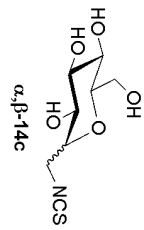

D<sub>2</sub>O, 300 MHz

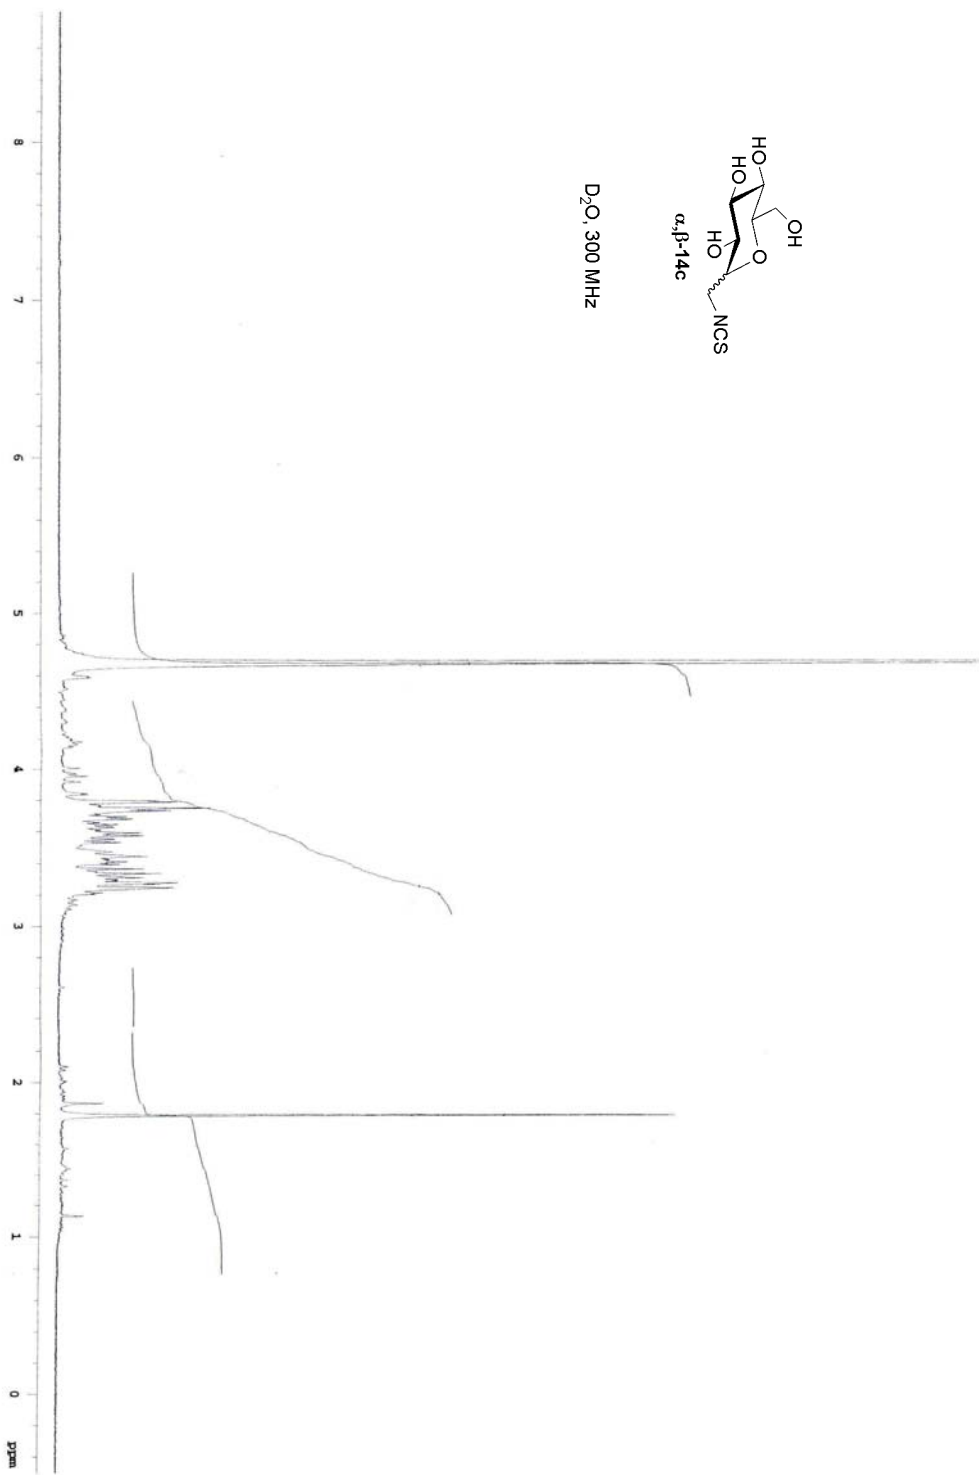

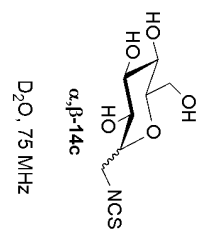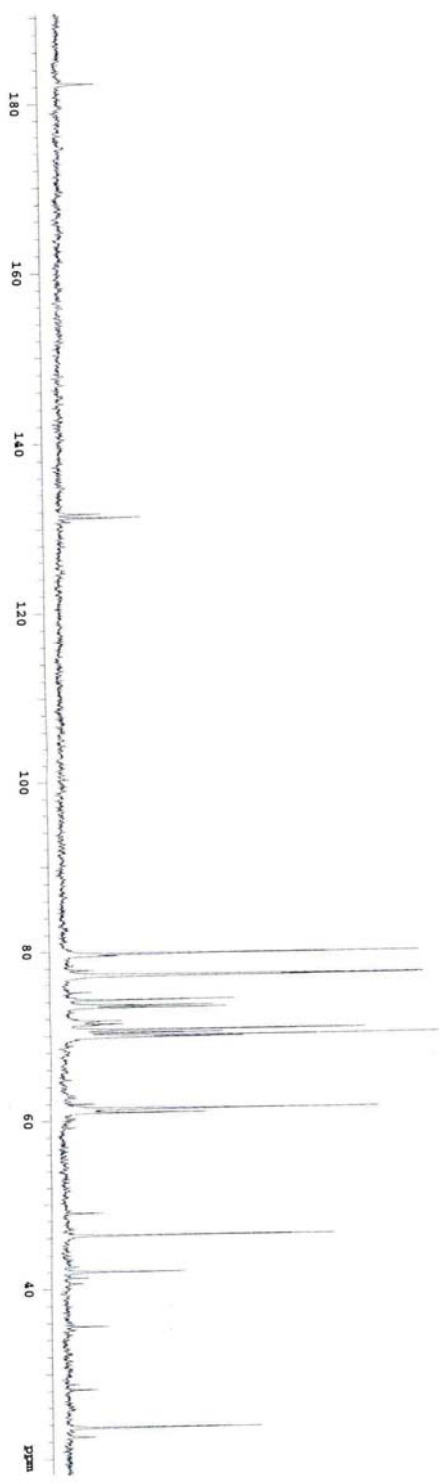



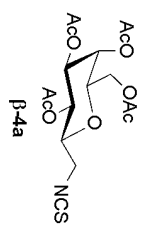

CDCl<sub>3</sub>, 300 MHz

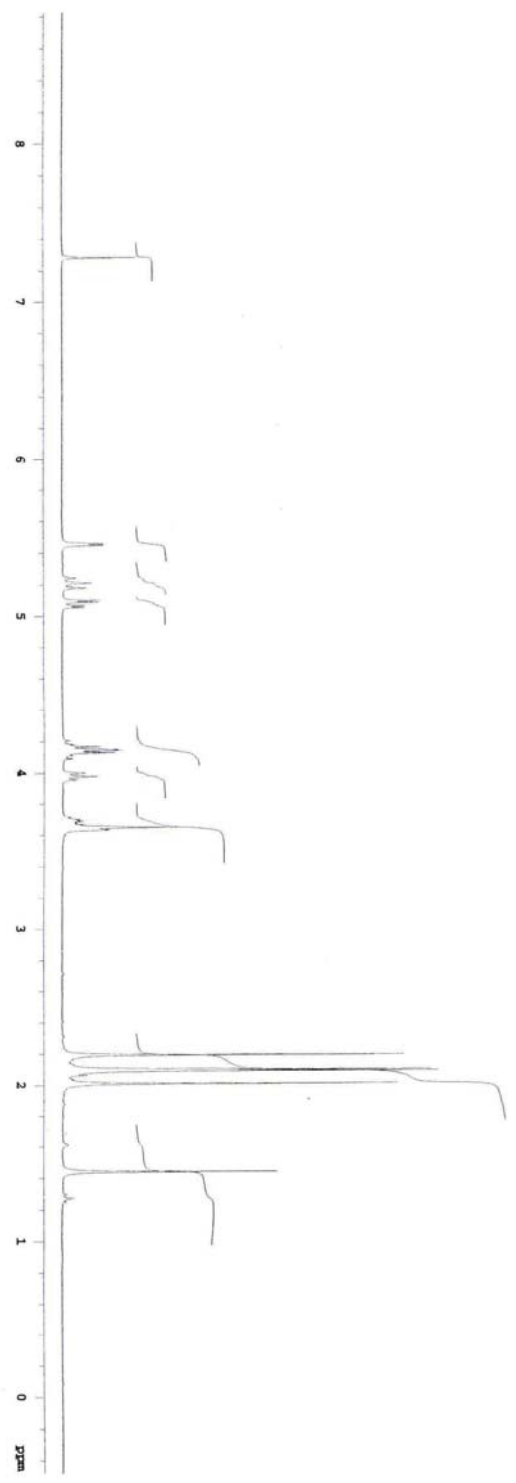

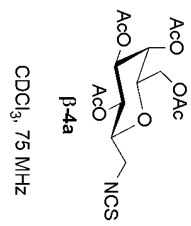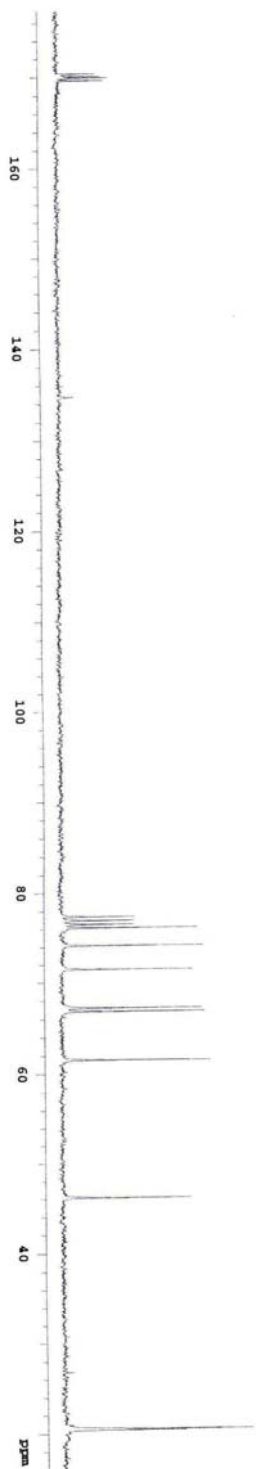

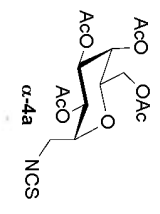

CDCl<sub>3</sub>, 300 MHz

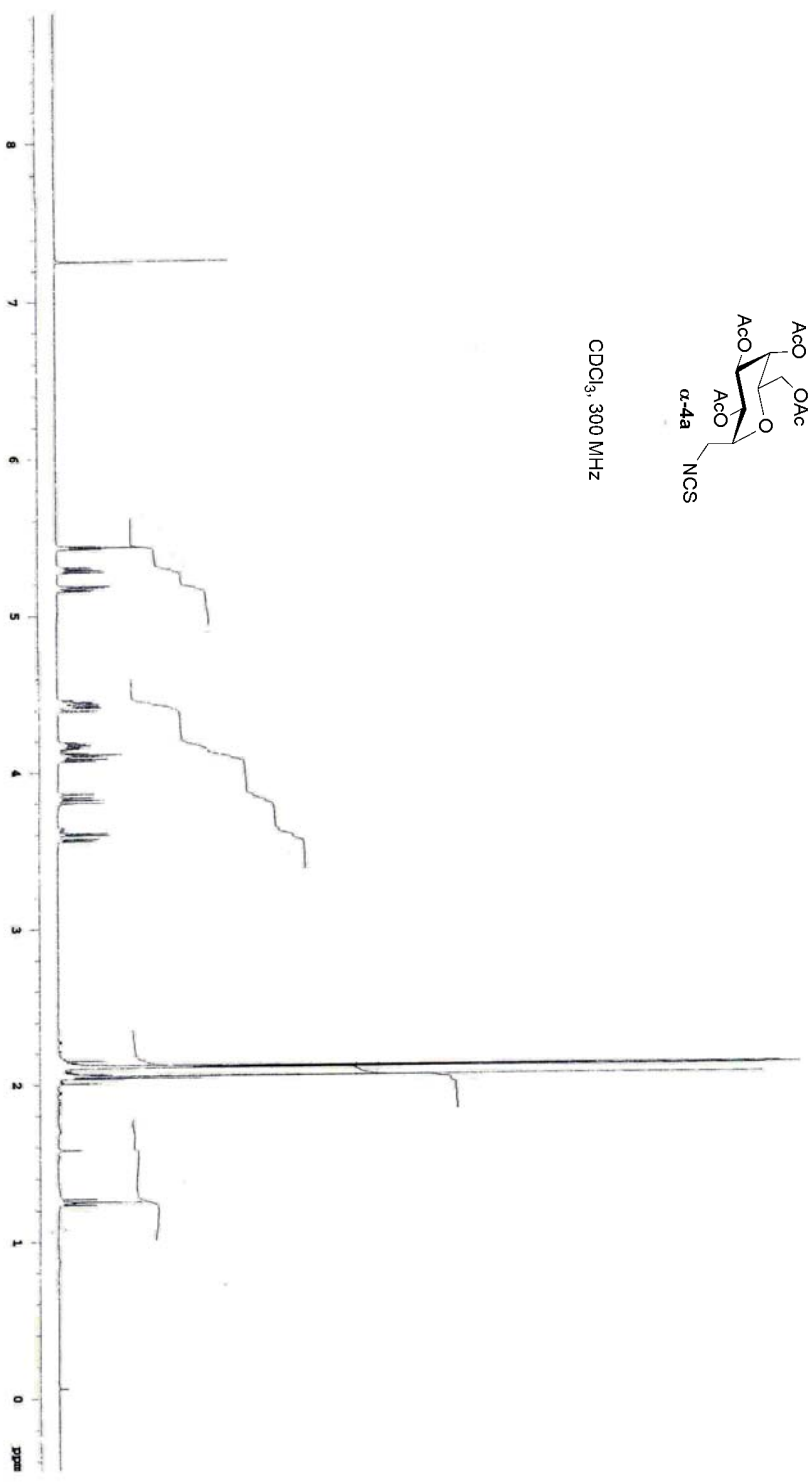

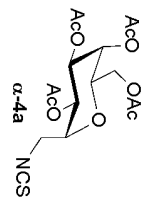

CDCl<sub>3</sub>, 75 MHz

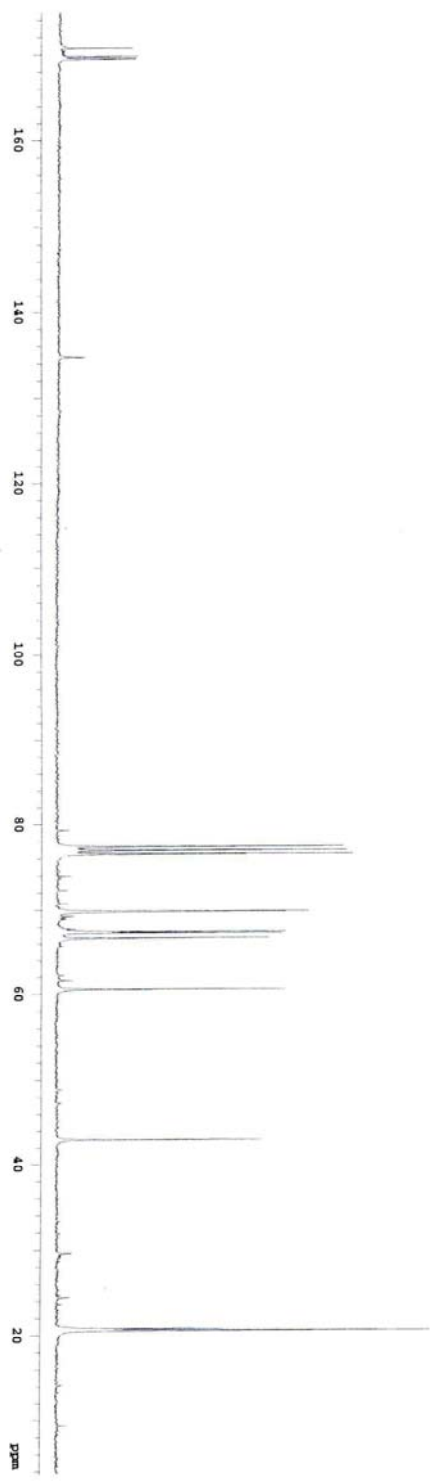

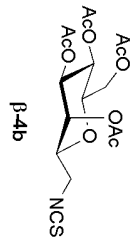

CDCl<sub>3</sub>, 300 MHz

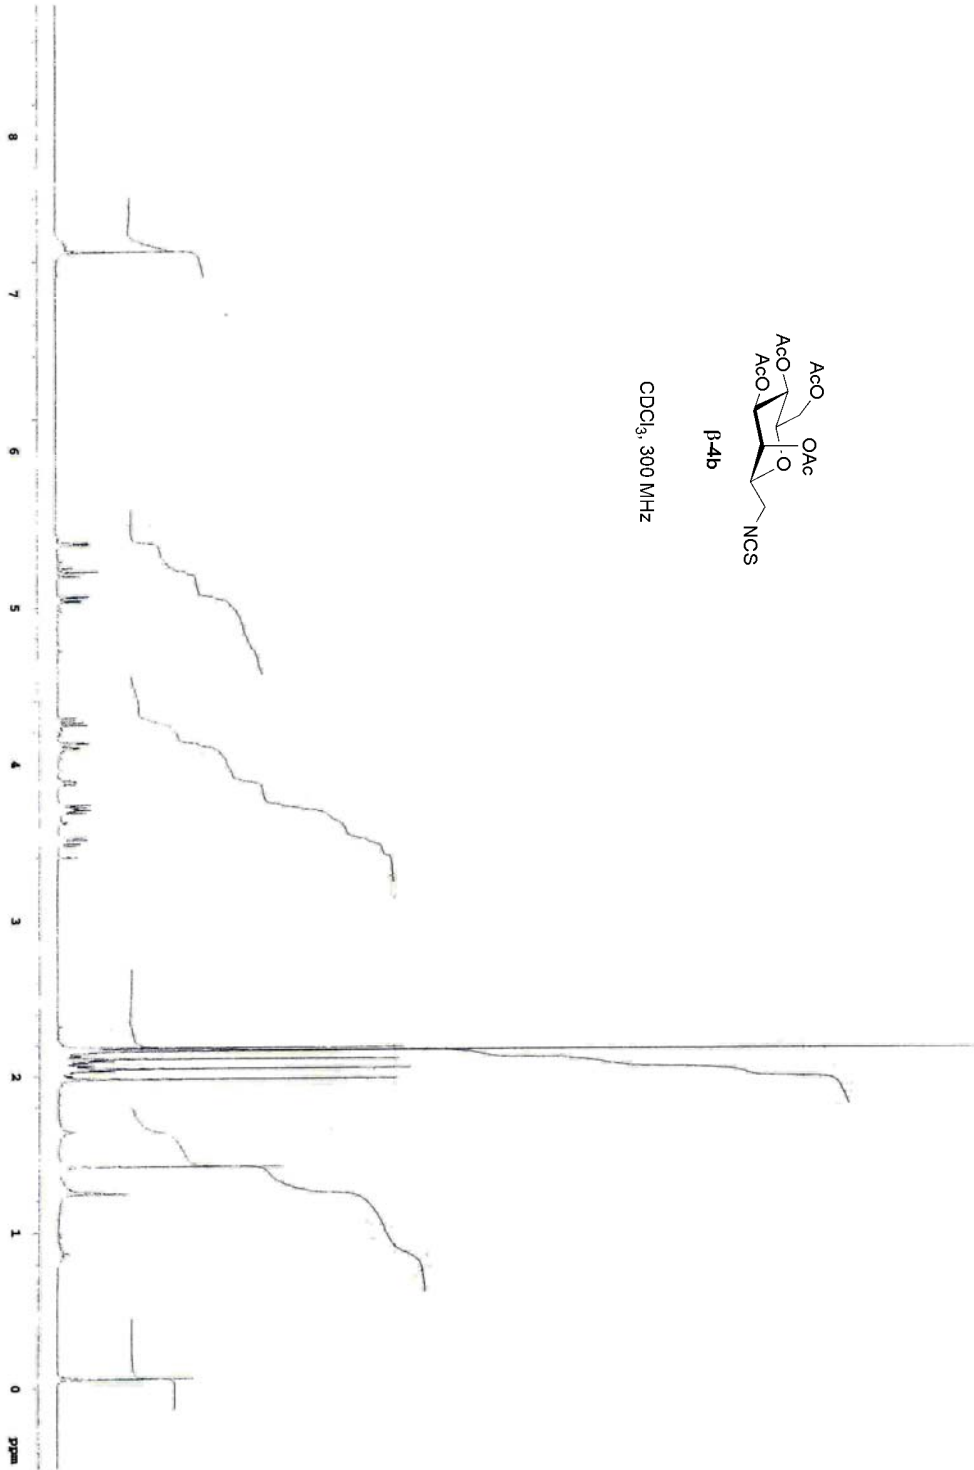

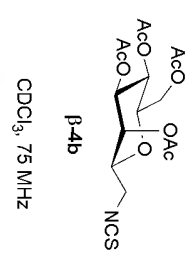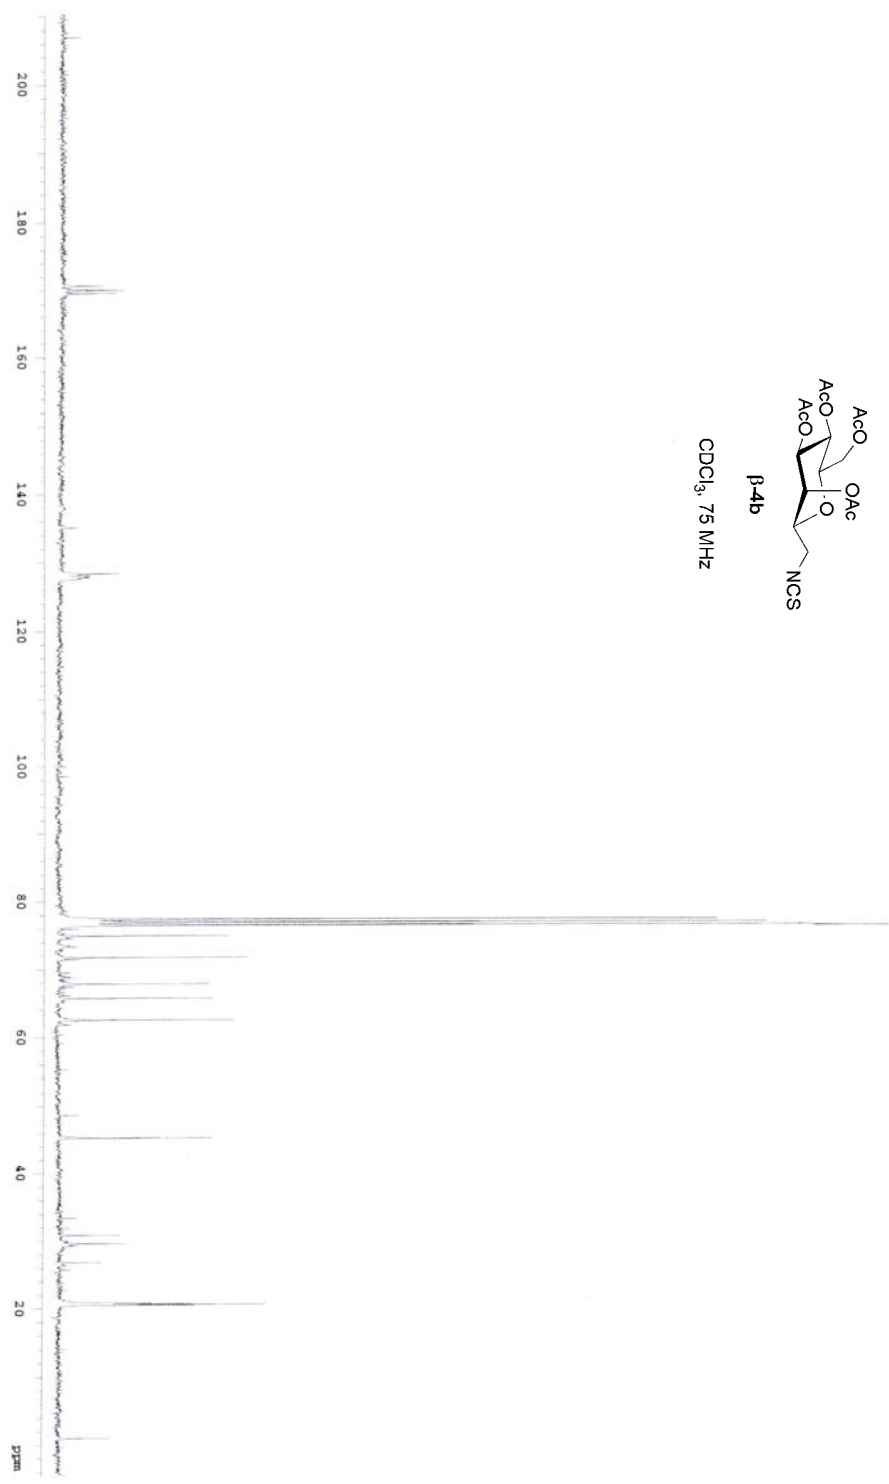

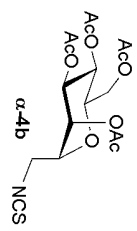

CDCl<sub>3</sub>, 300 MHz

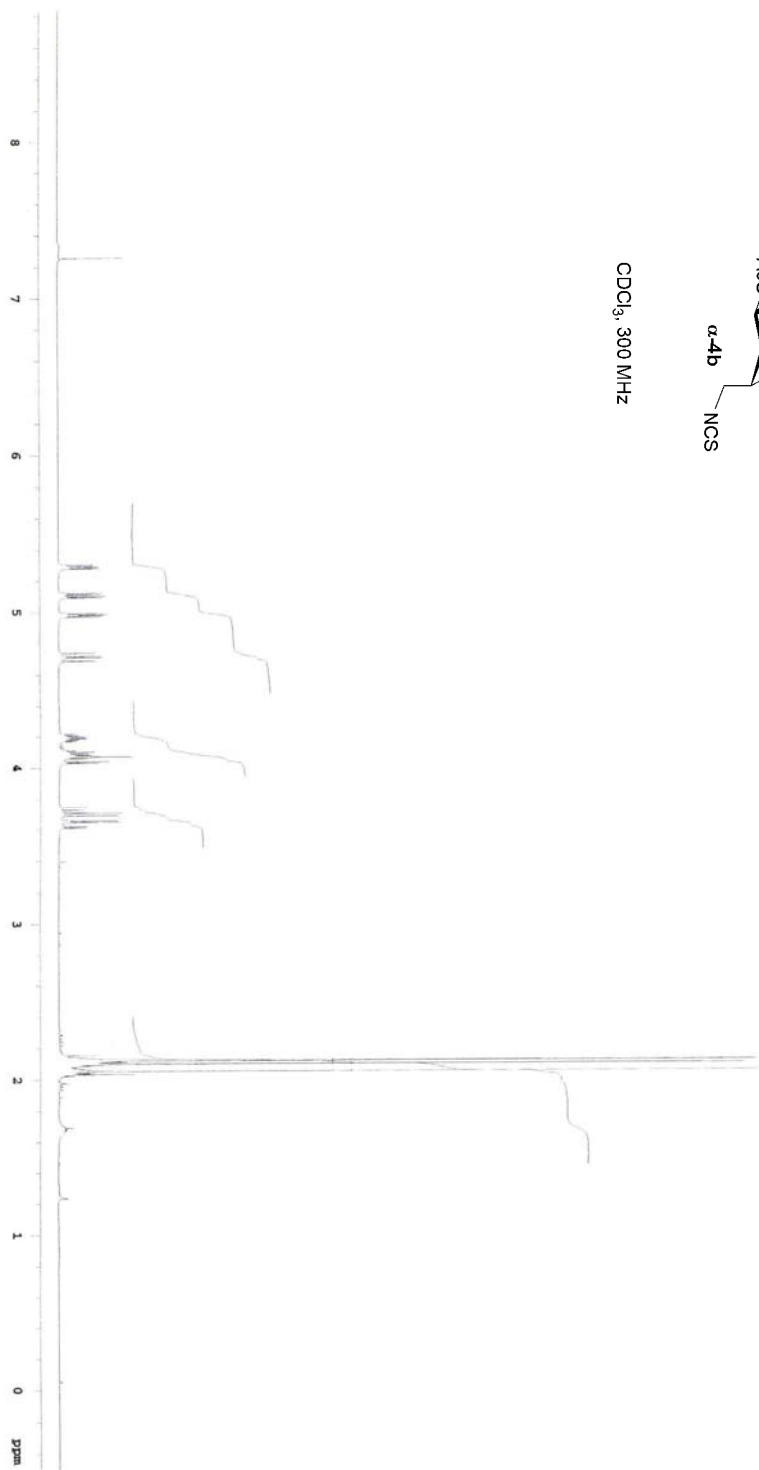

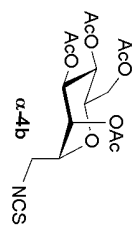

CDCl<sub>3</sub>, 75 MHz

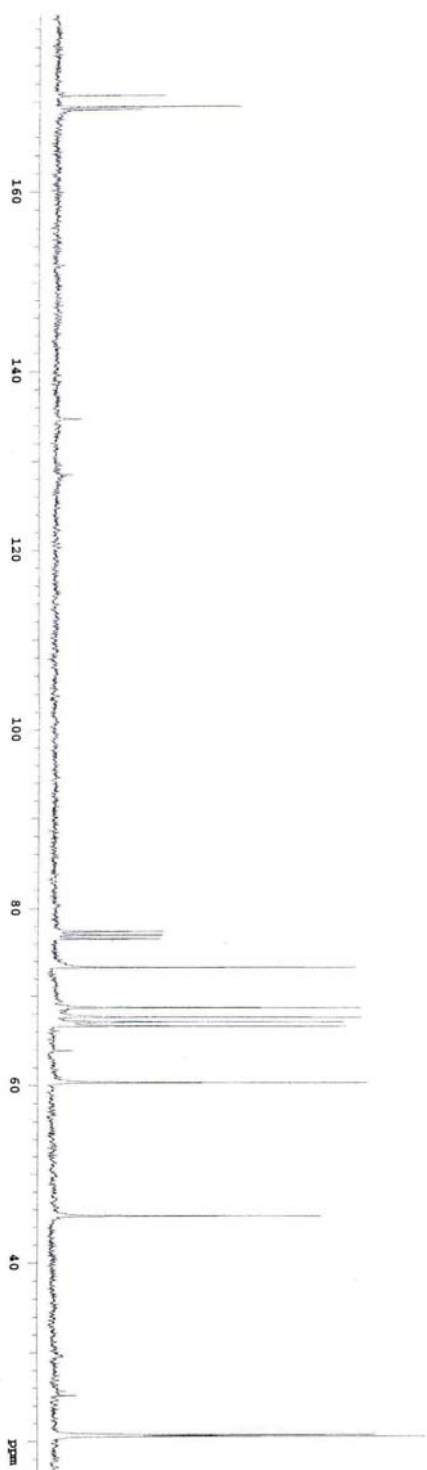



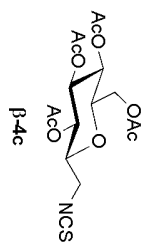

CDCl<sub>3</sub>, 300 MHz

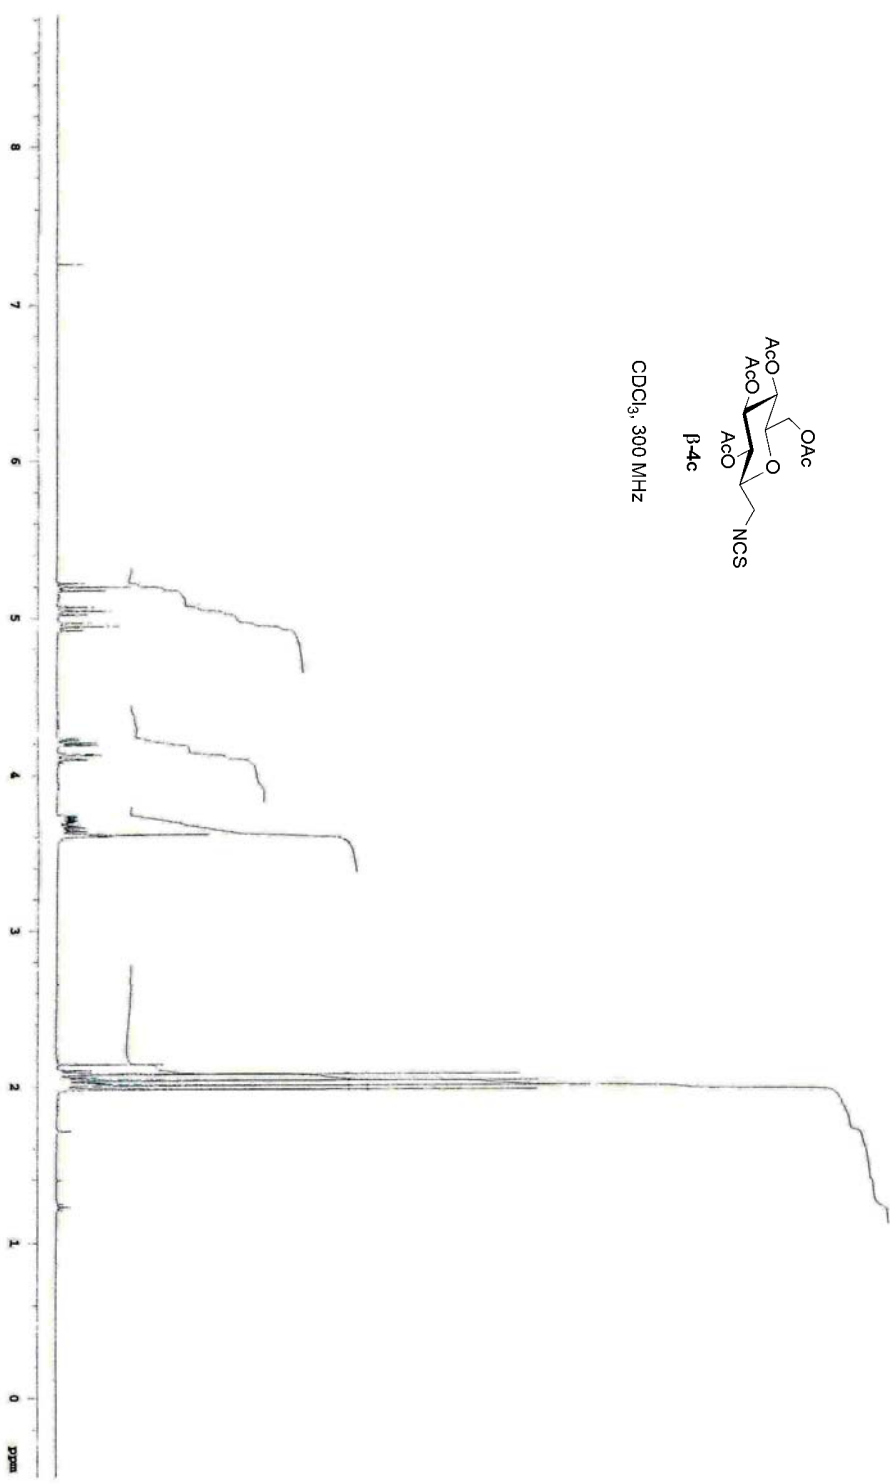

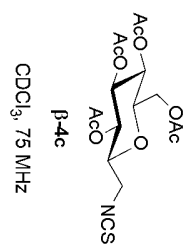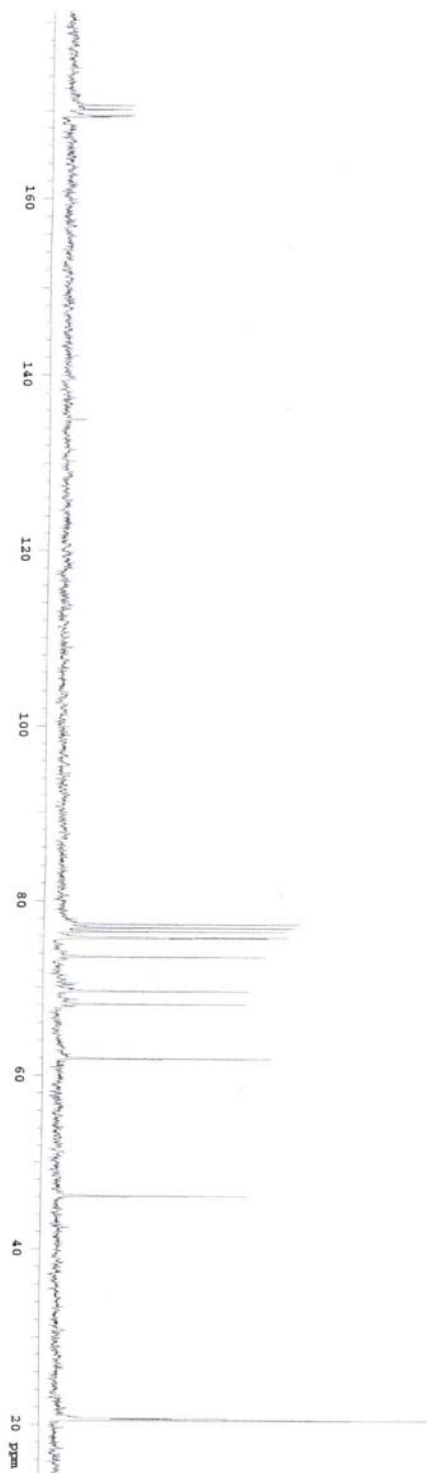

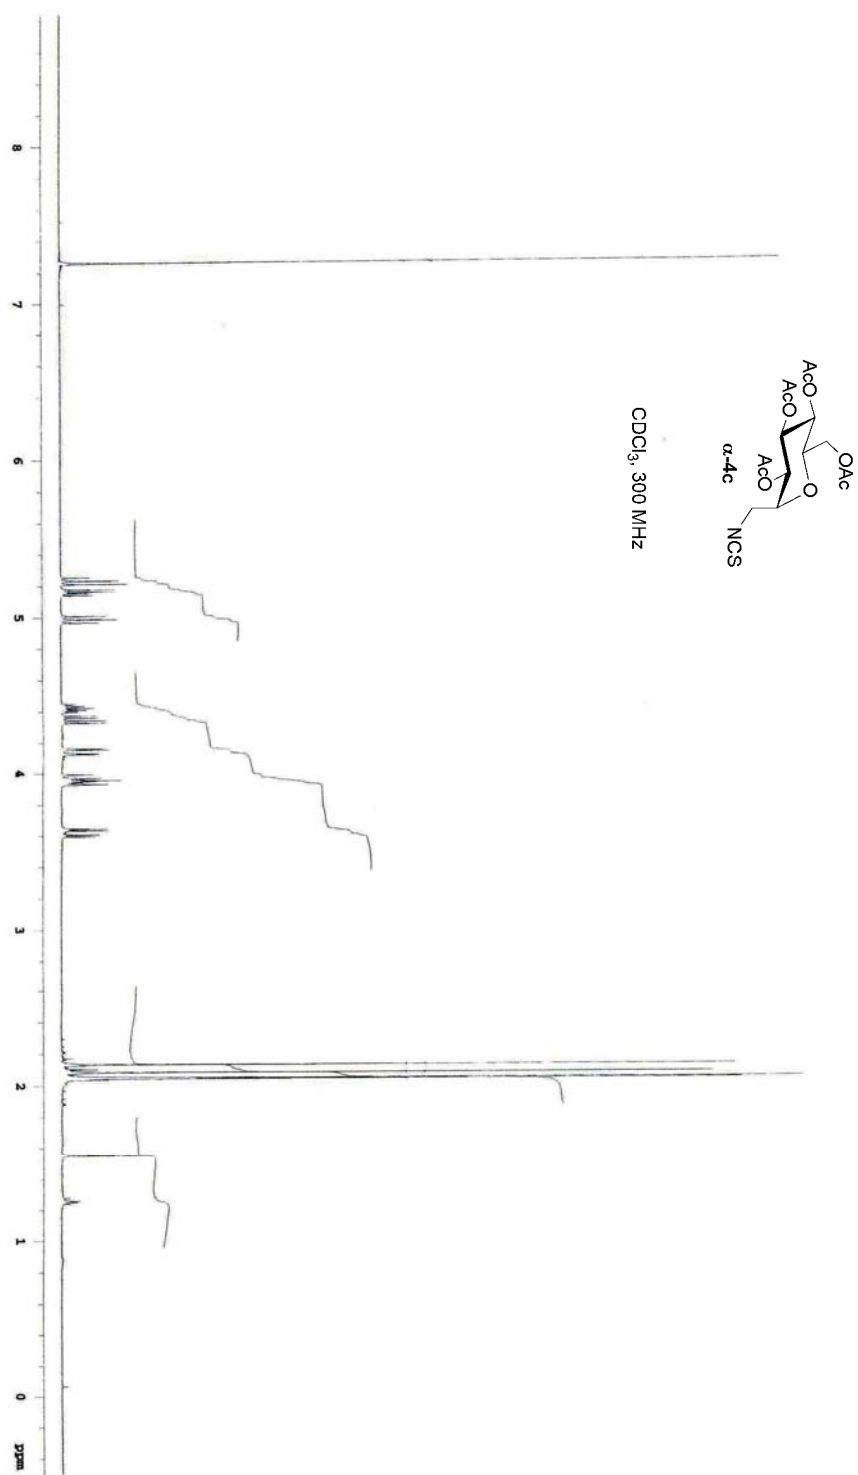

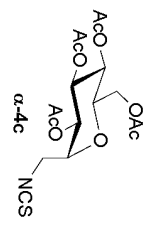

CDCl<sub>3</sub>, 75 MHz

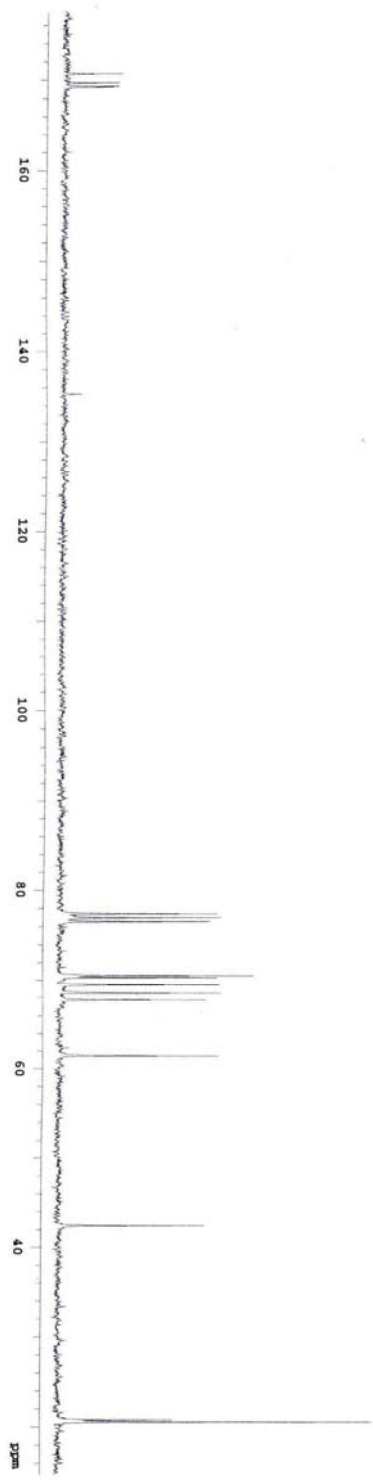

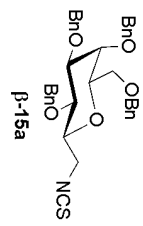

CDCl<sub>3</sub>, 300 MHz

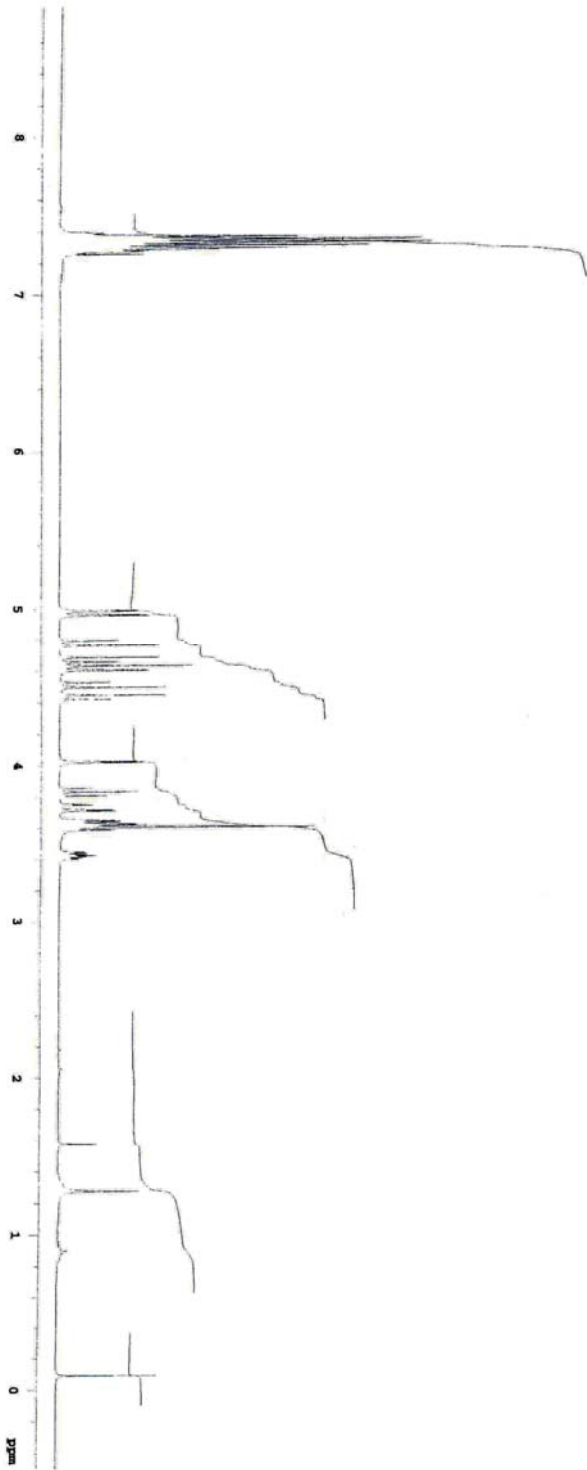

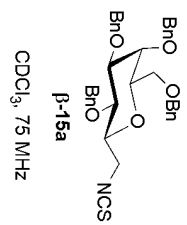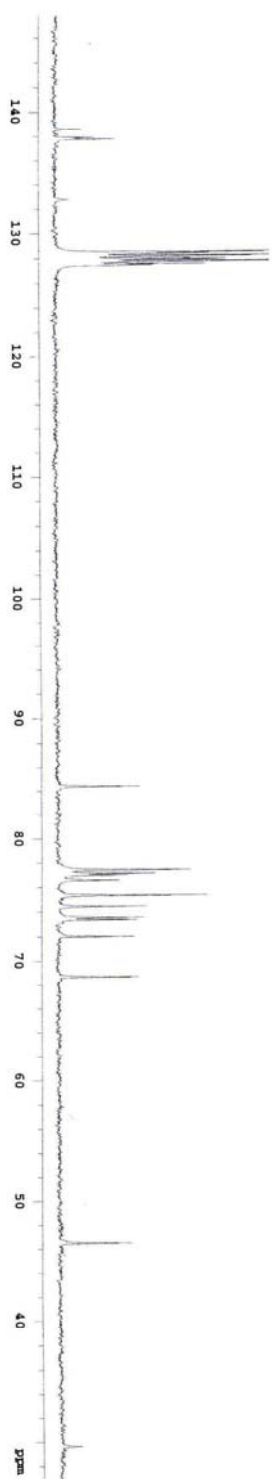

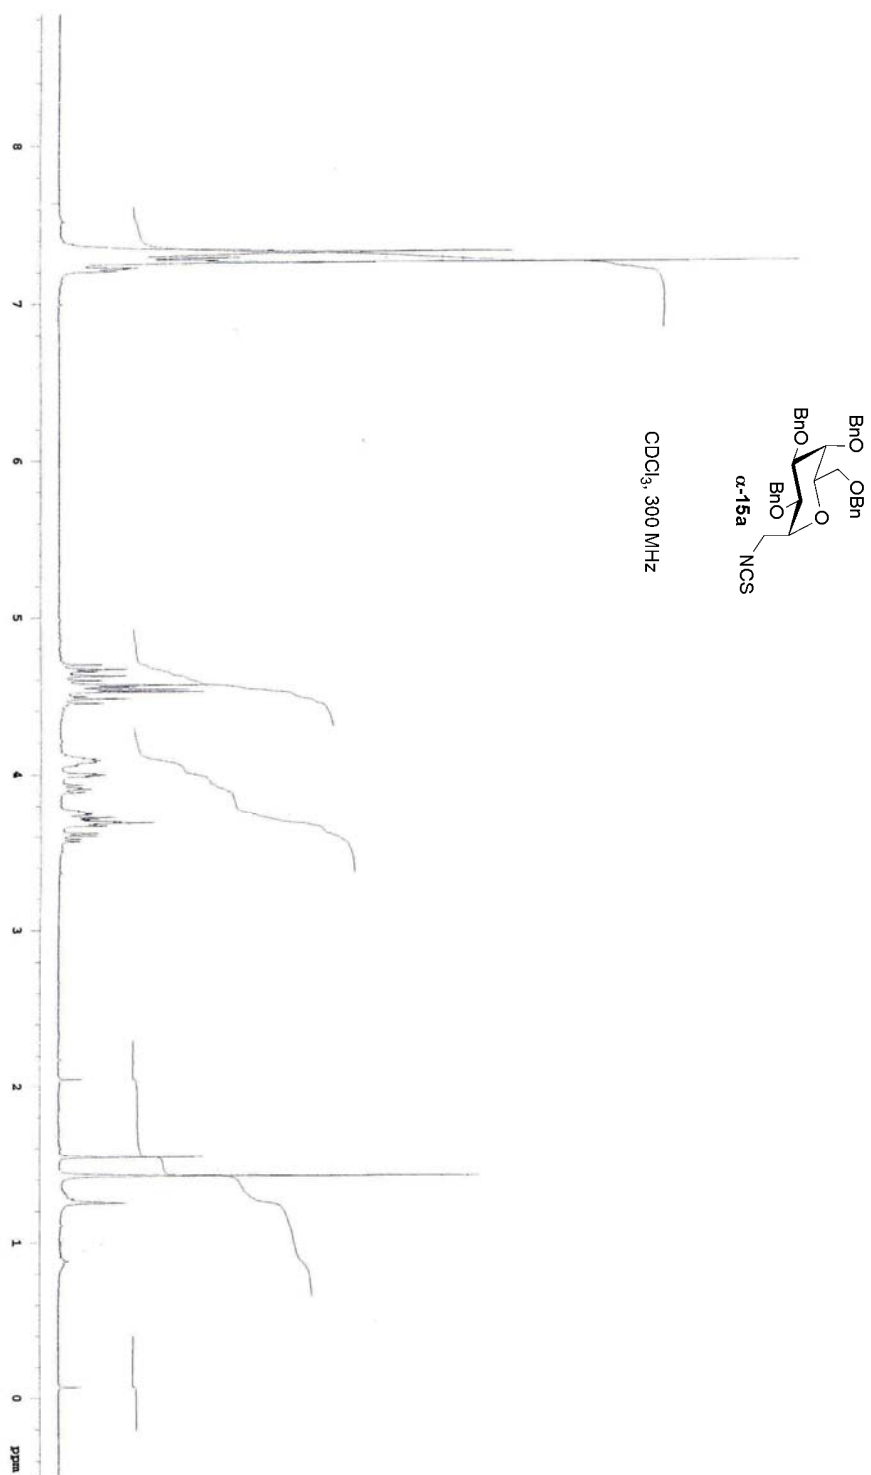

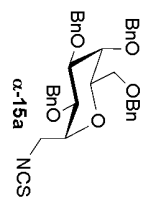

CDCl<sub>3</sub>, 75 MHz

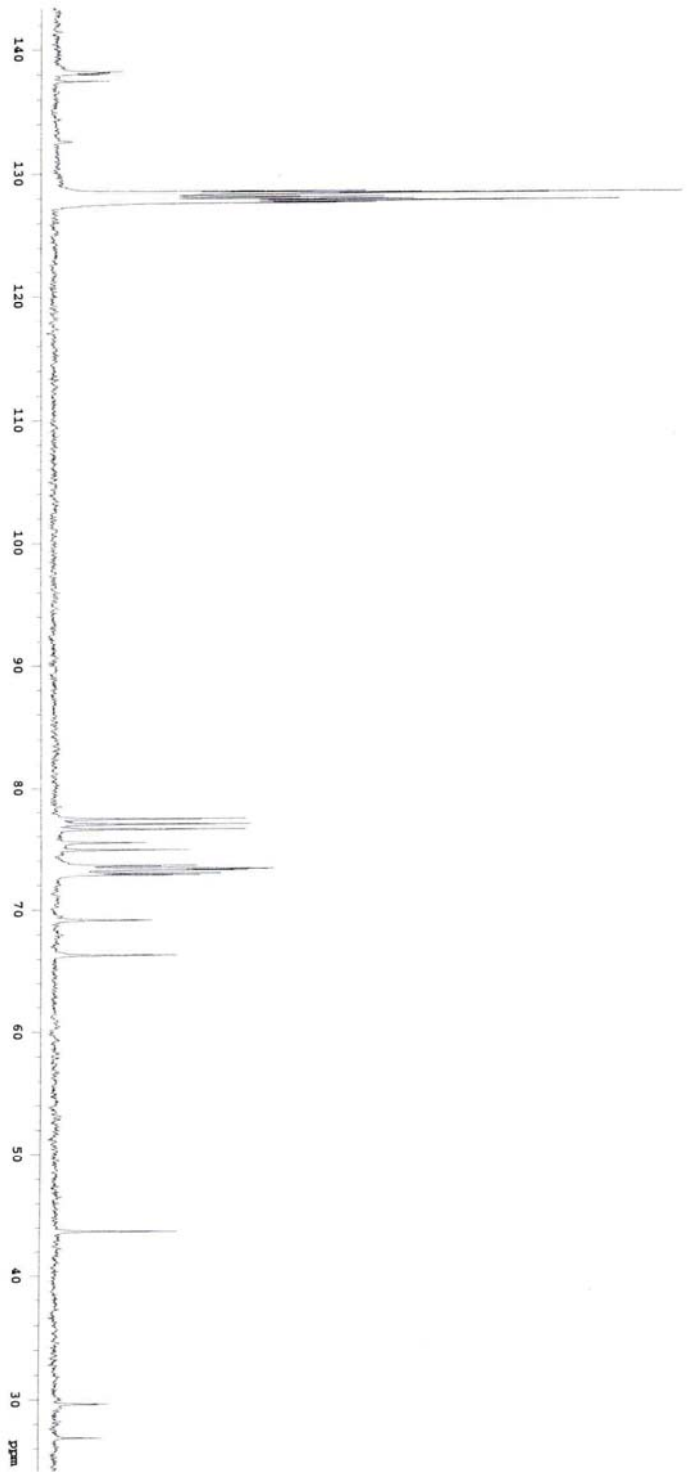



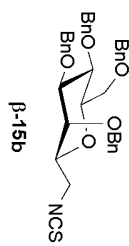

CDCl<sub>3</sub>, 300 MHz

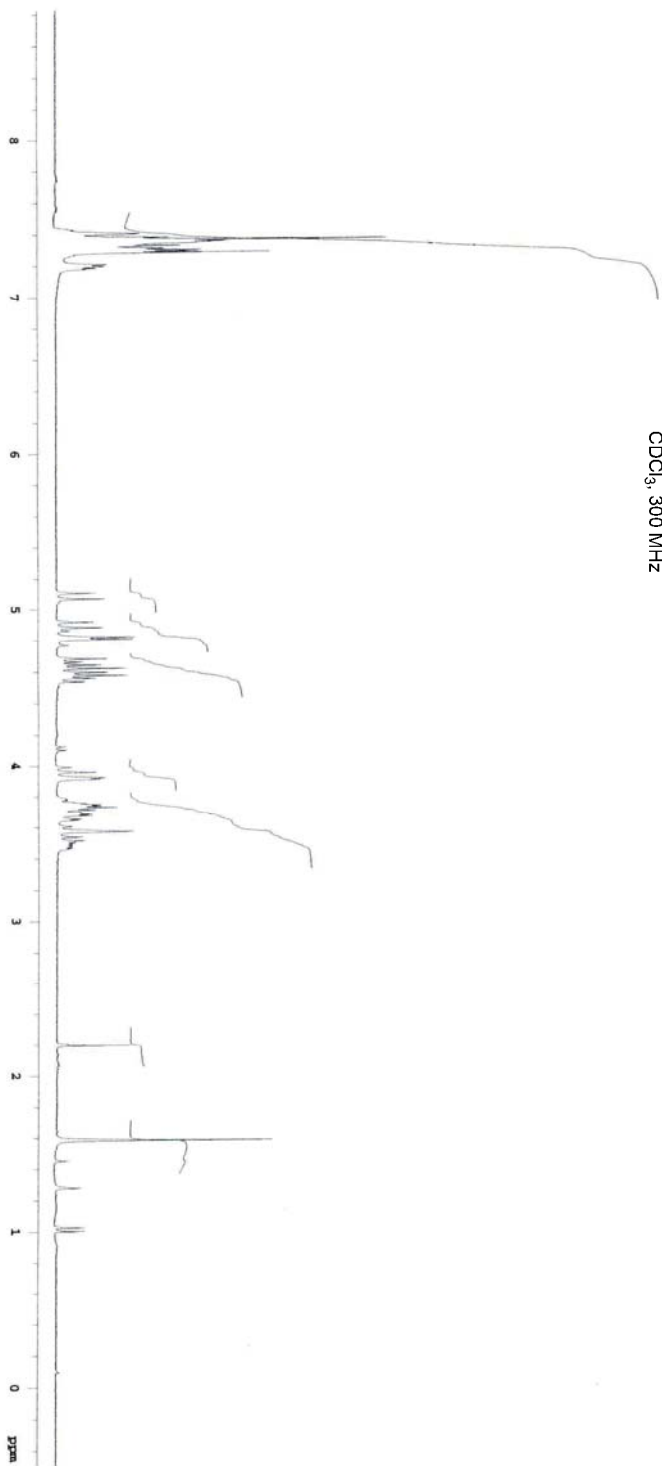

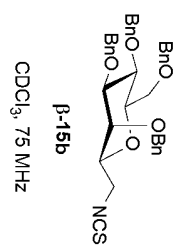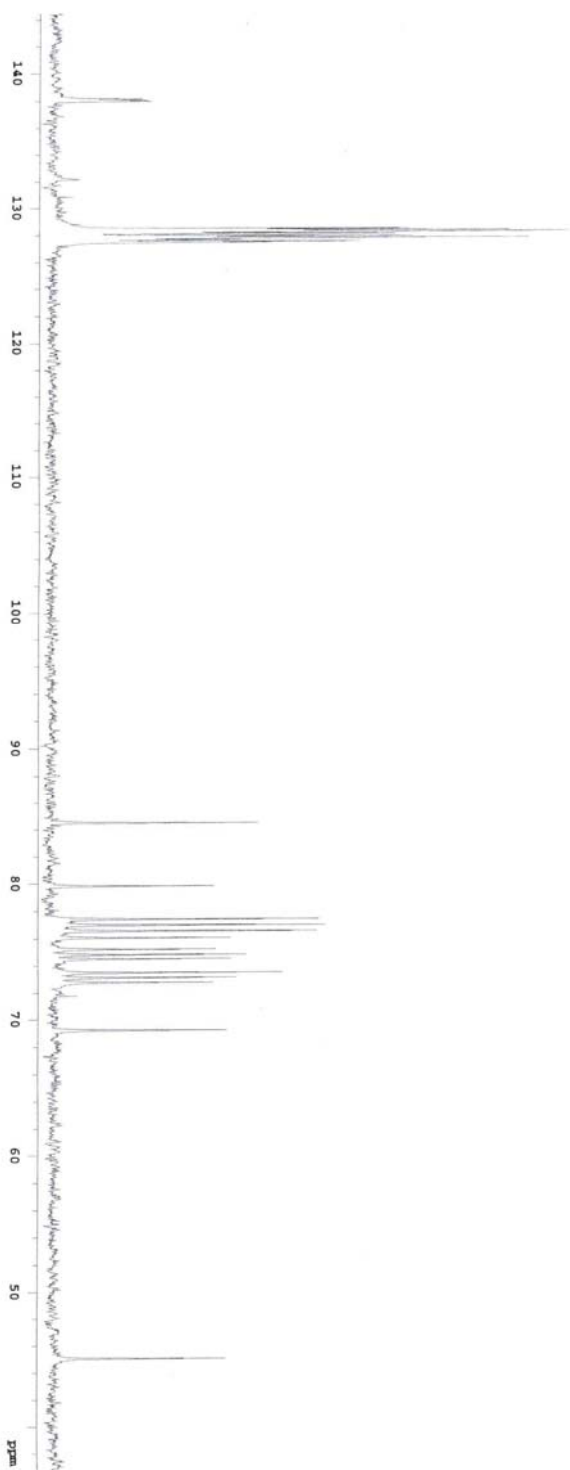

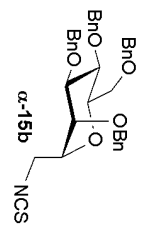

CDCl<sub>3</sub>, 300 MHz

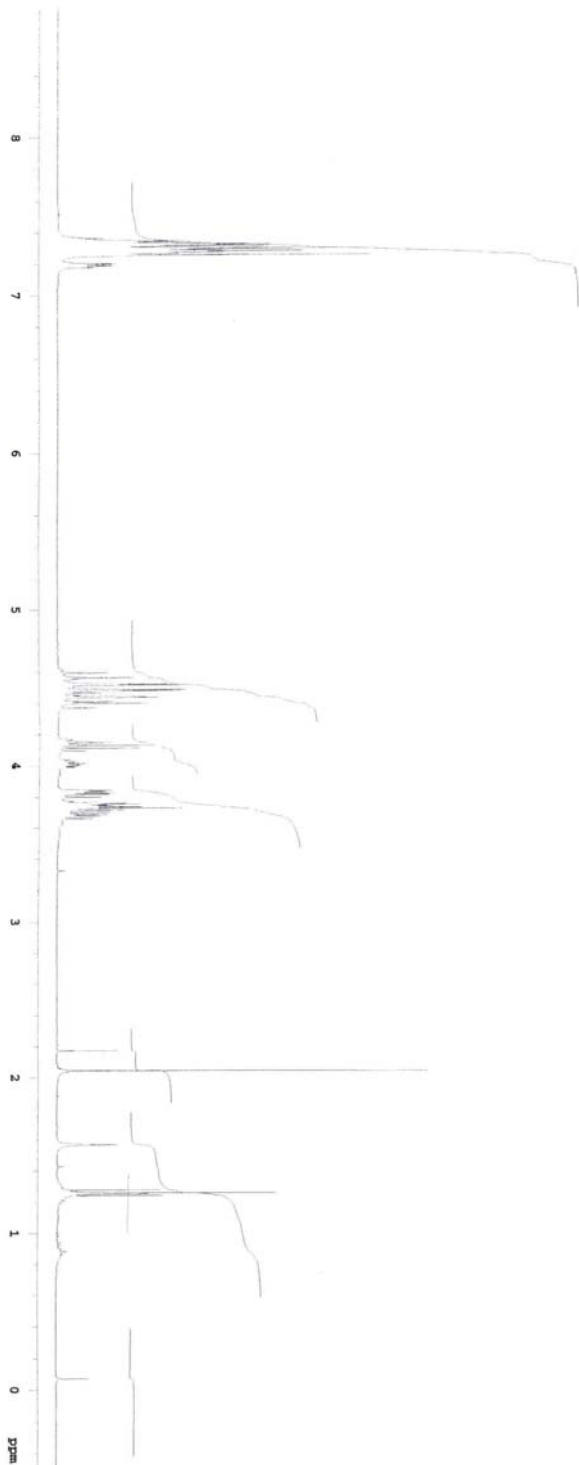

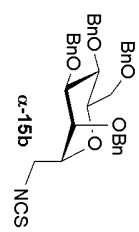

CDCl<sub>3</sub>, 75 MHz

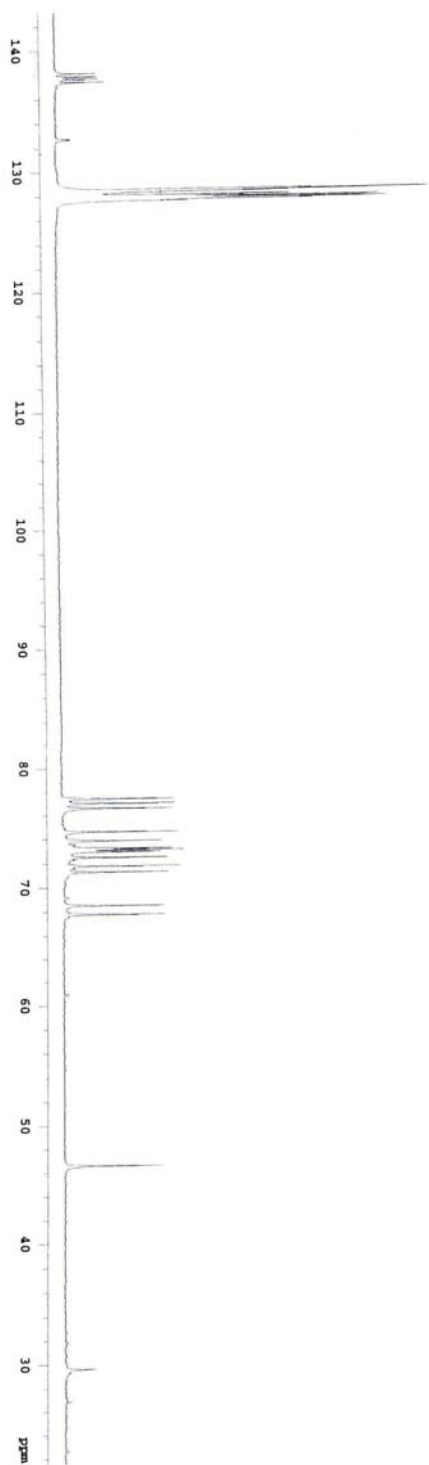

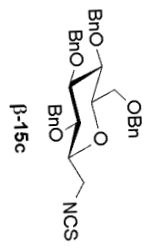

$C_6D_6$ , 300 MHz

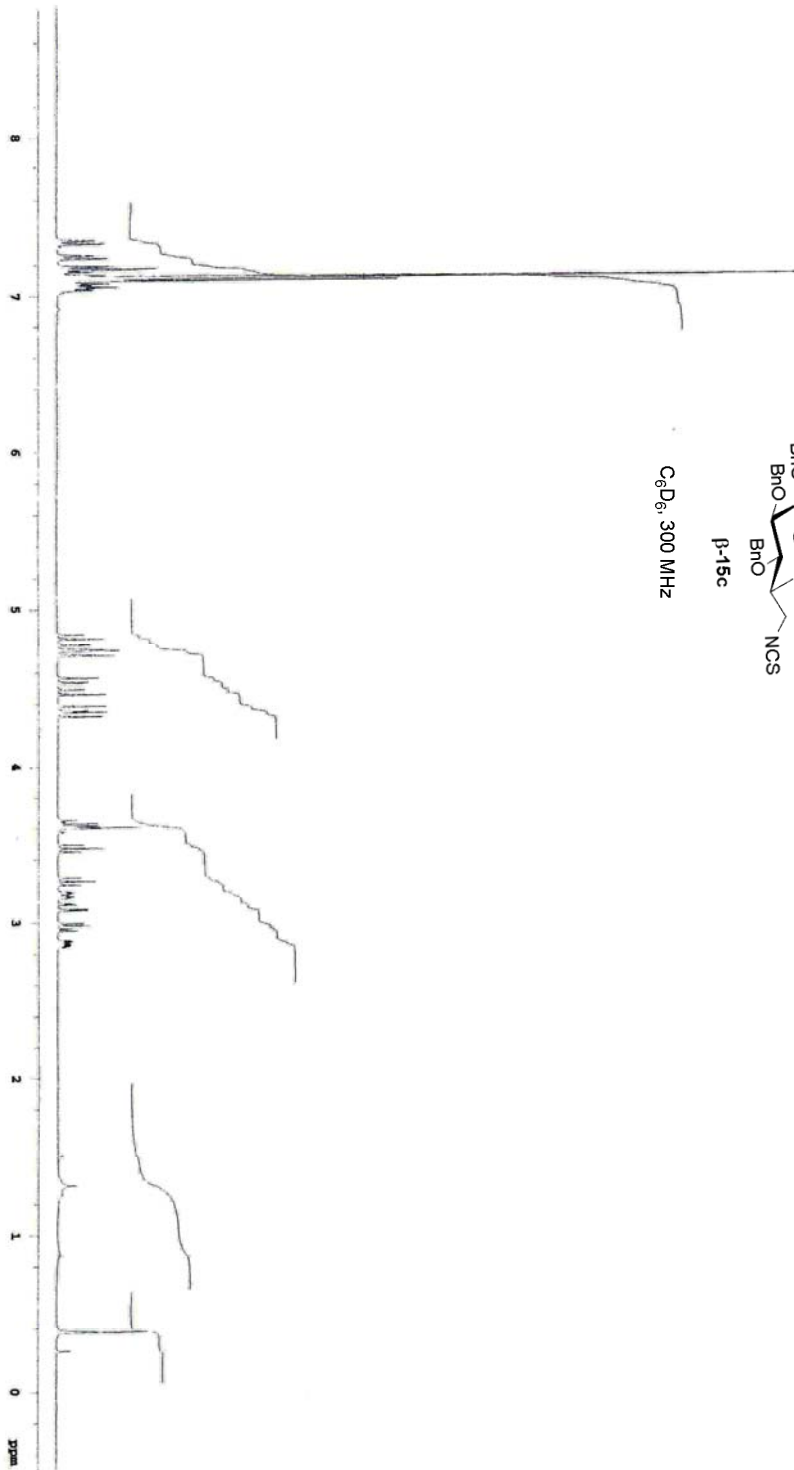

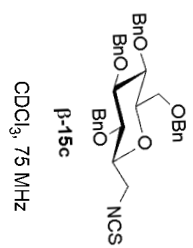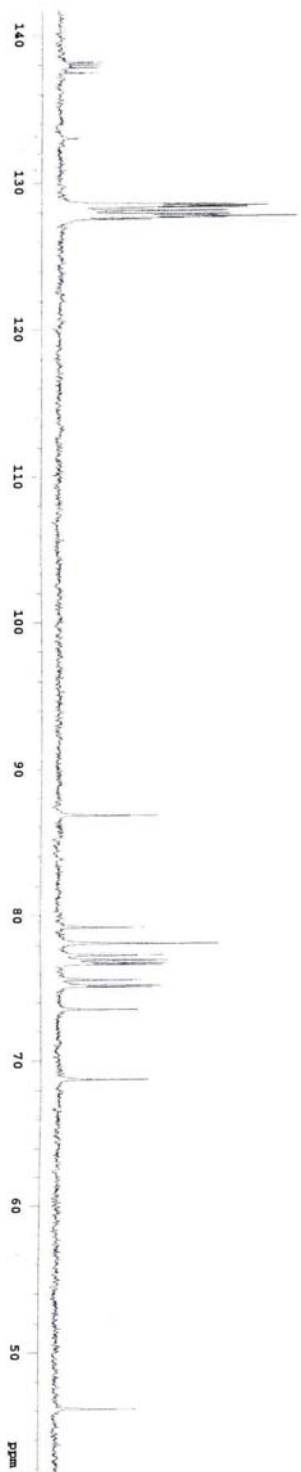

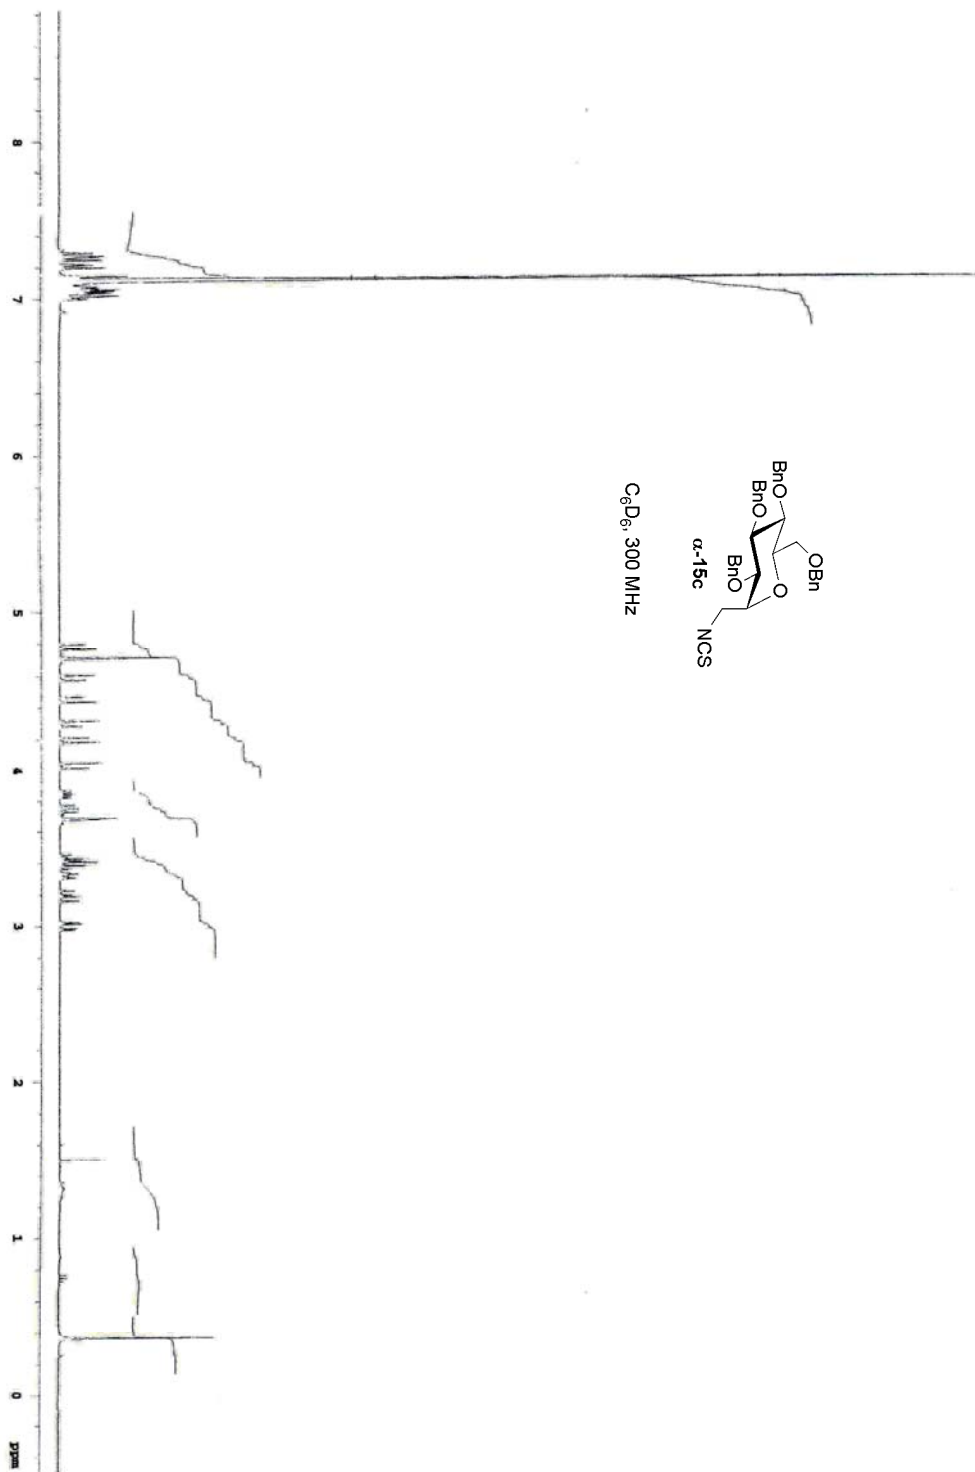

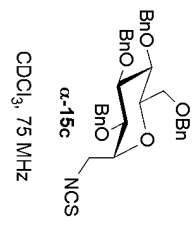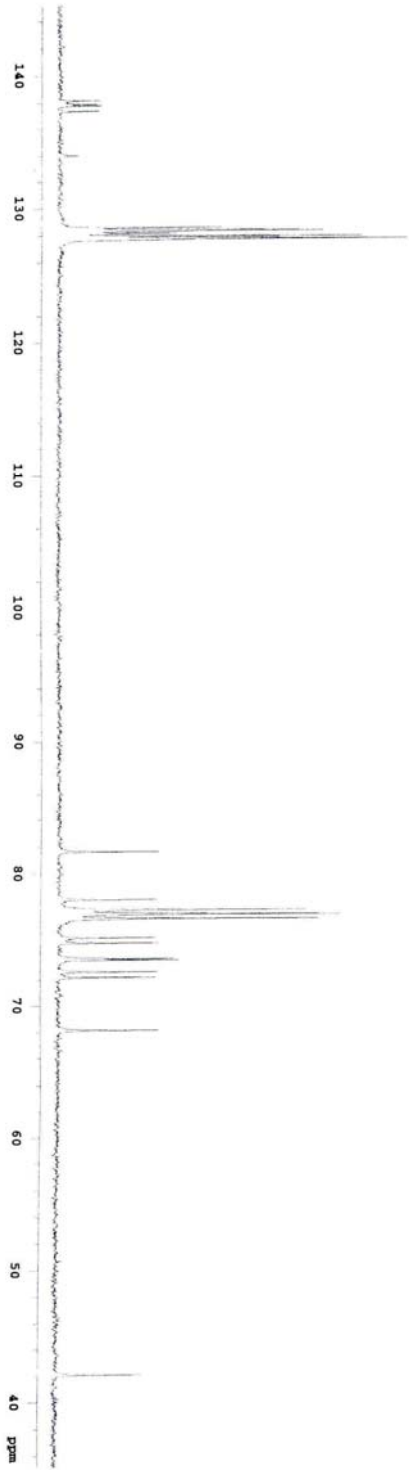



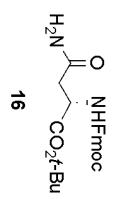

CDCl<sub>3</sub>, 300 MHz

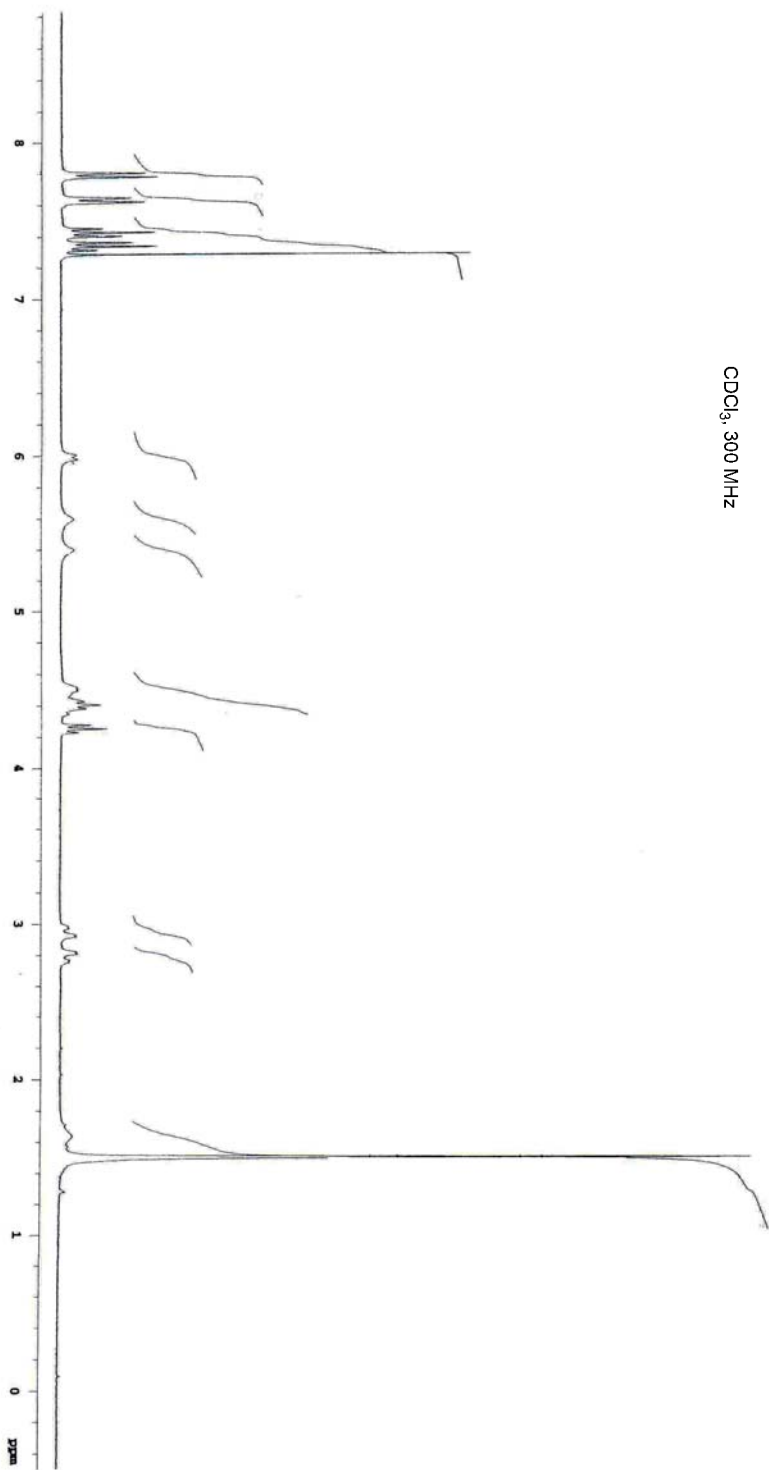

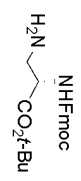

**6**

CDCl<sub>3</sub>, 300 MHz

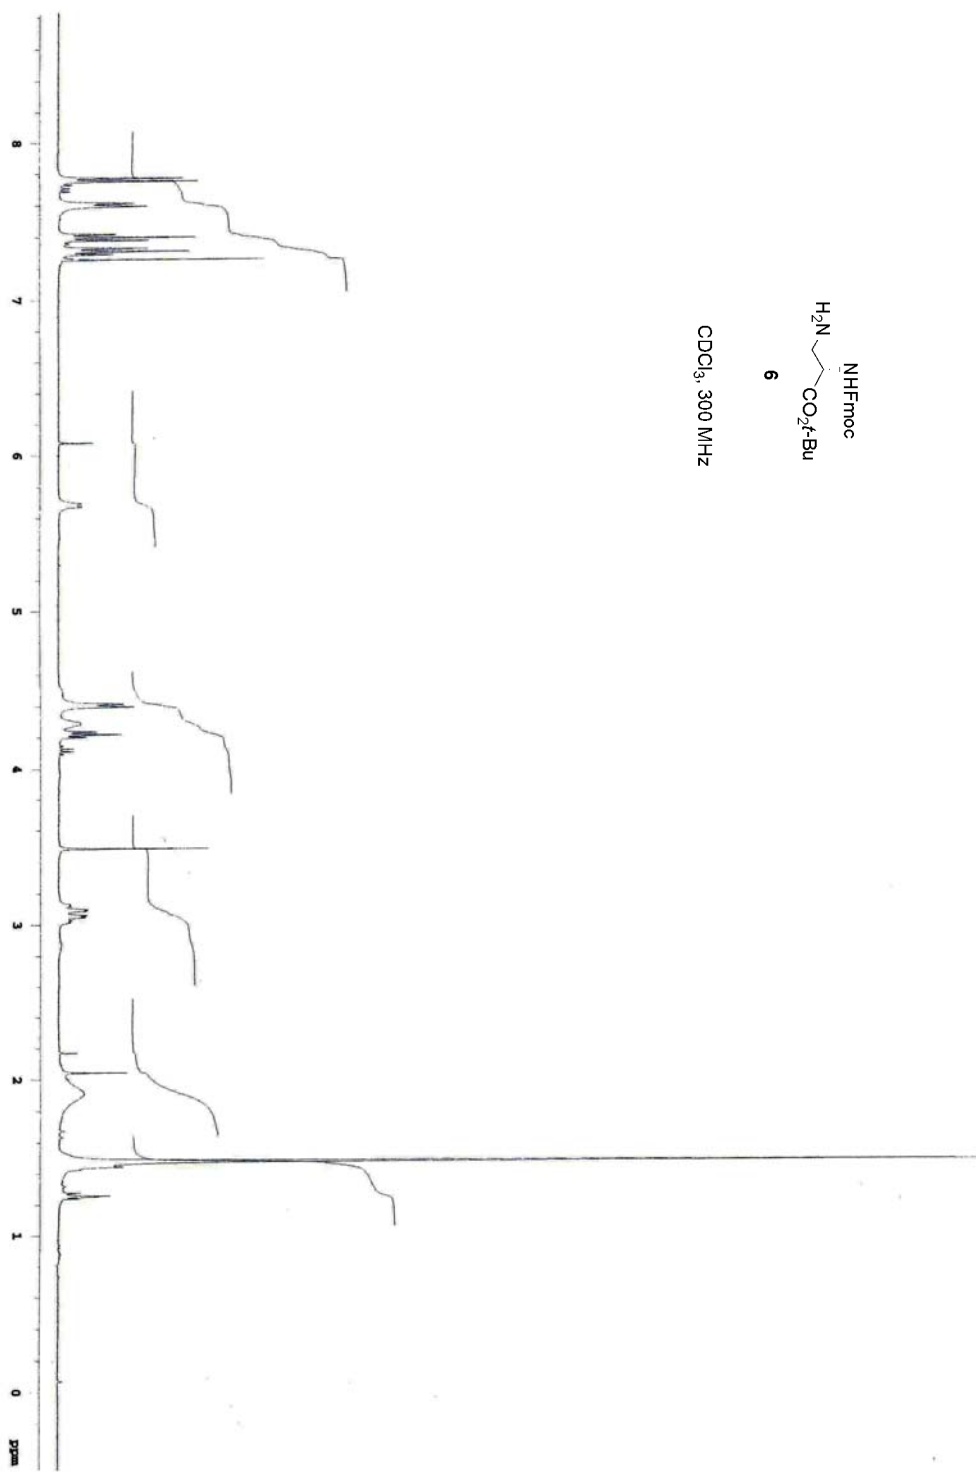

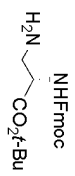

6

CDCl<sub>3</sub>, 75 MHz

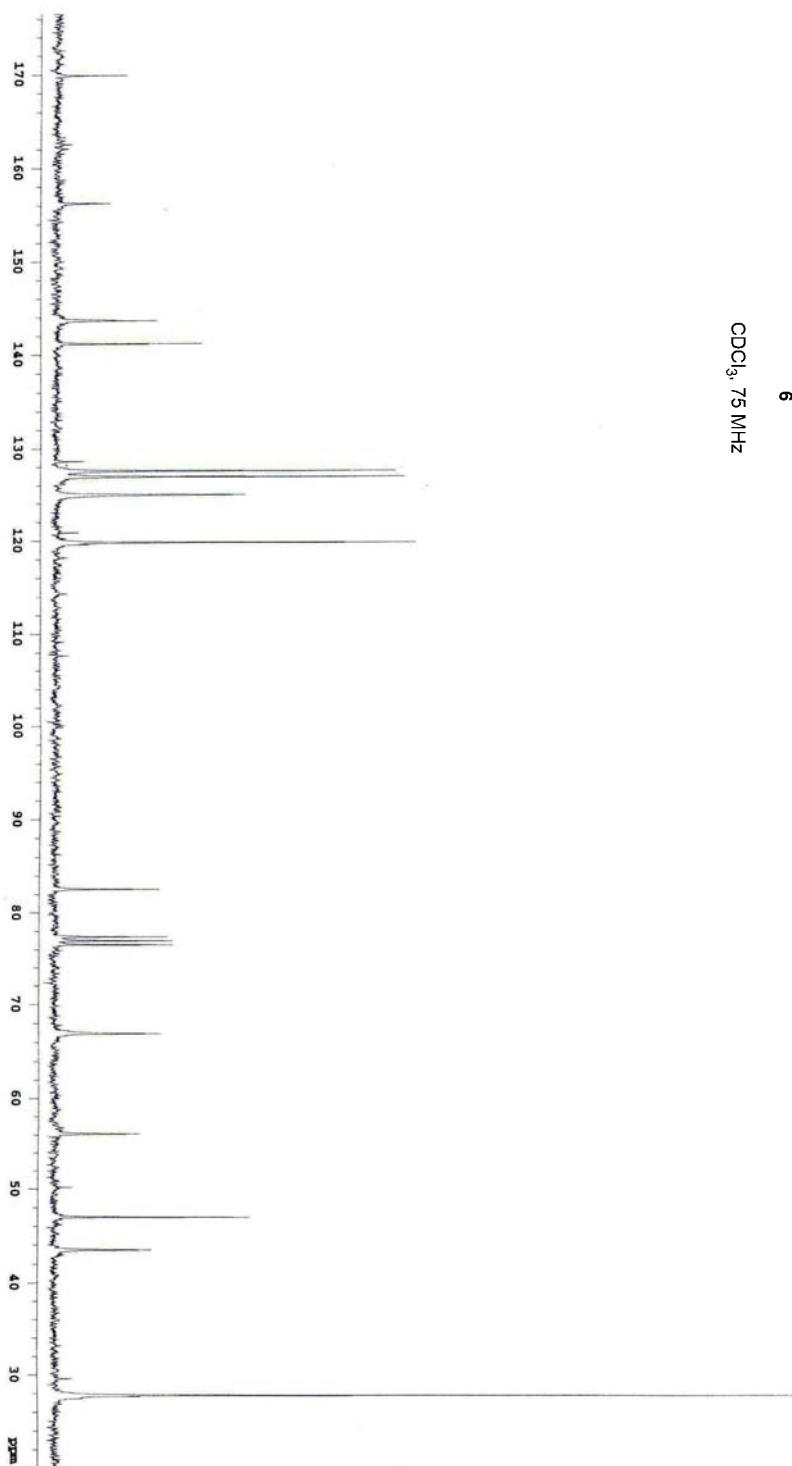

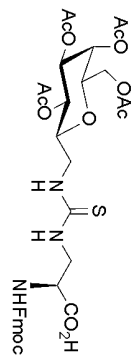

$\beta$ -7a  
acetone-d<sub>6</sub>, 300 MHz

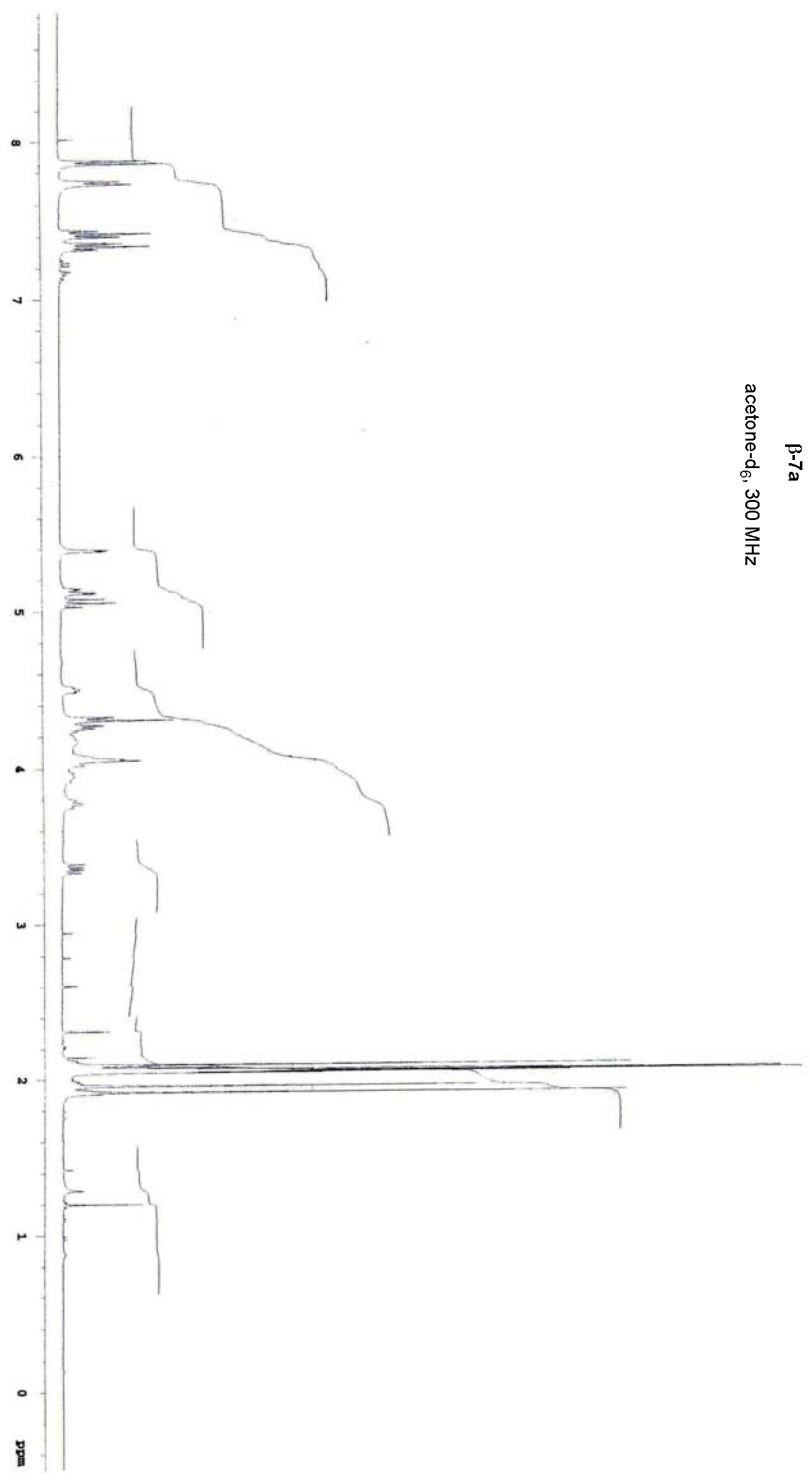

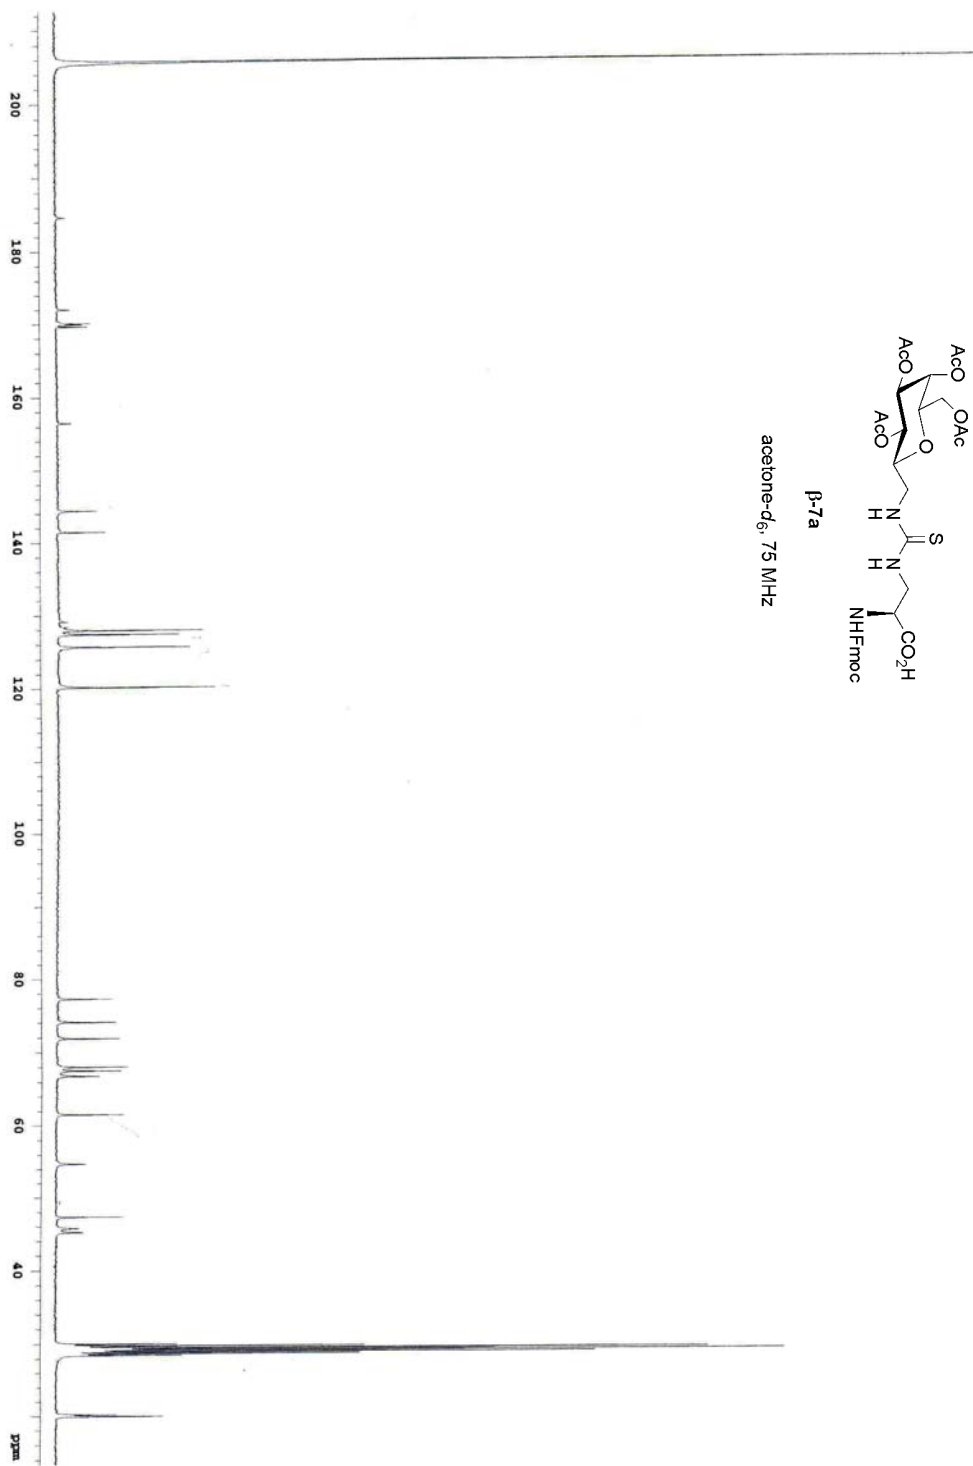

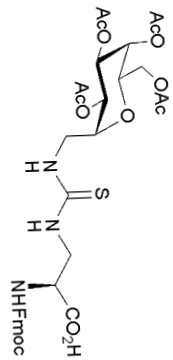

acetone-d<sub>6</sub>, 300 MHz

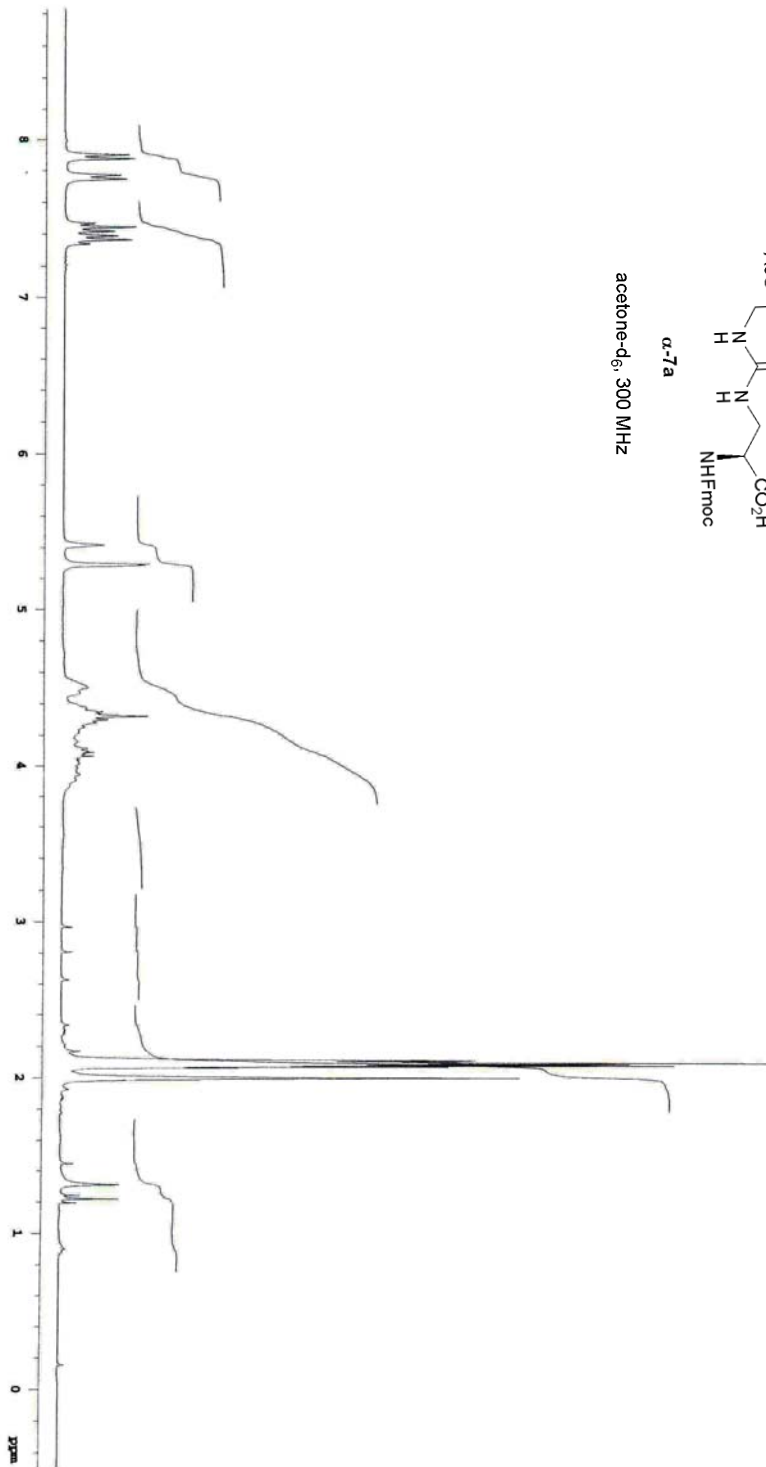

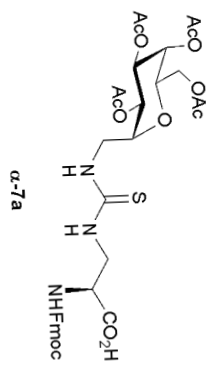

acetone-d<sub>6</sub>, 75 MHz

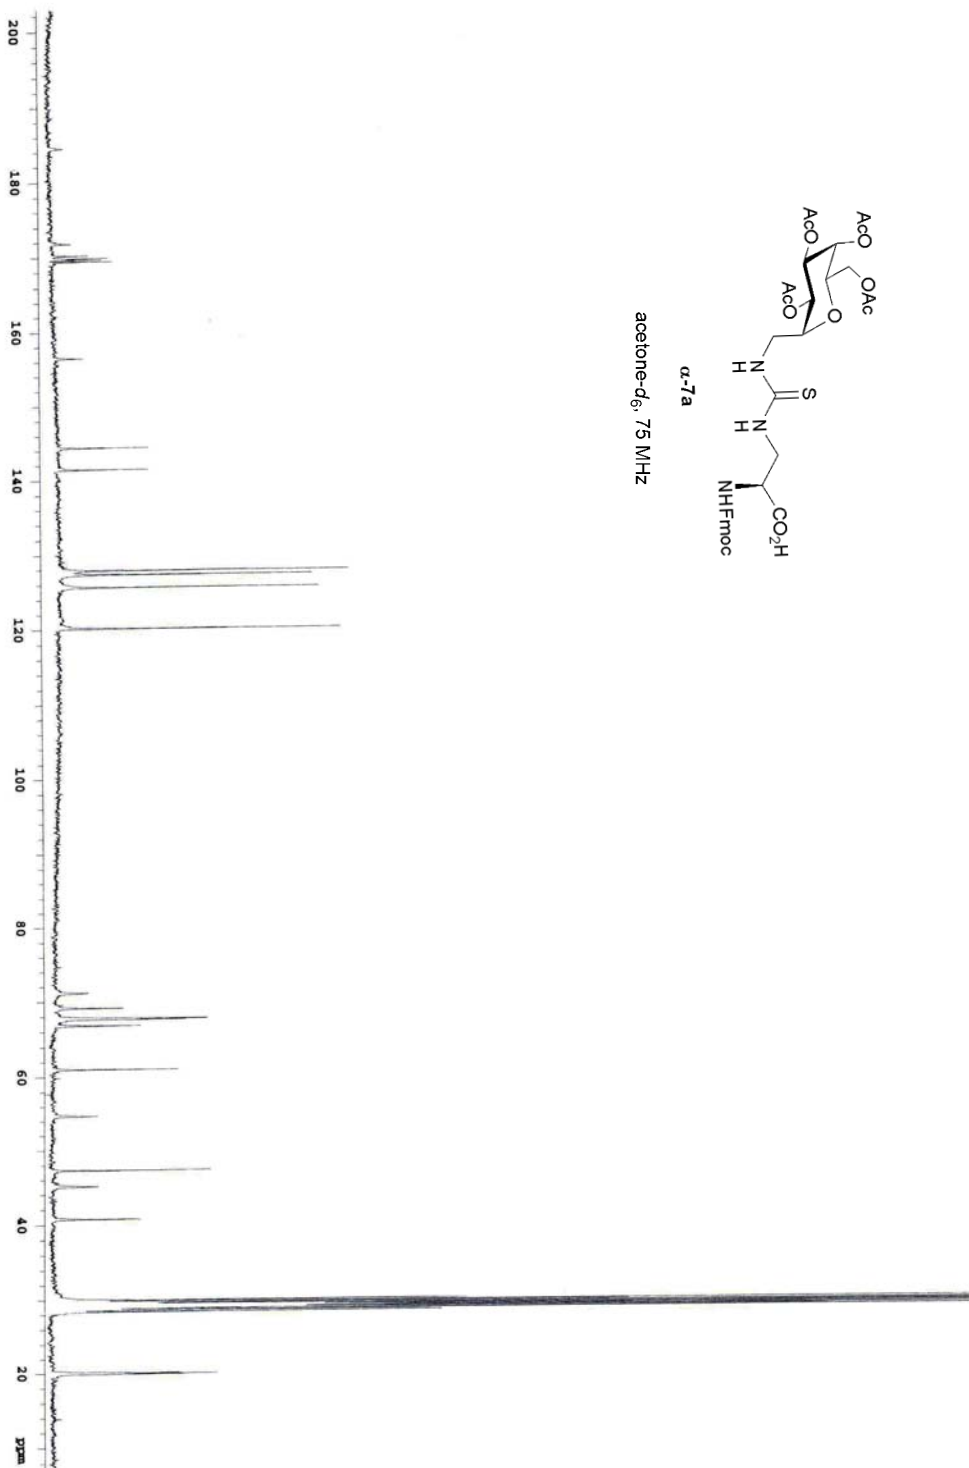

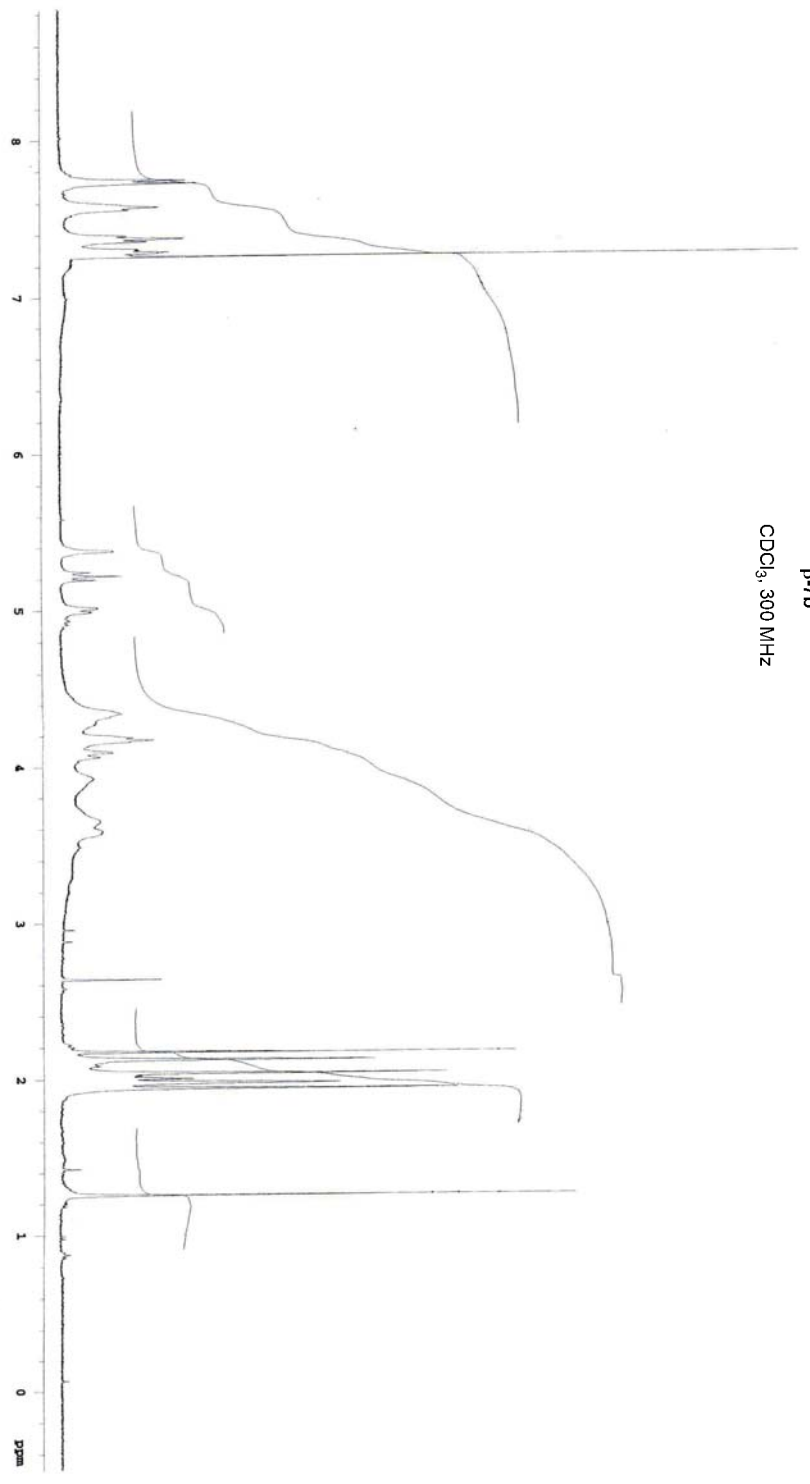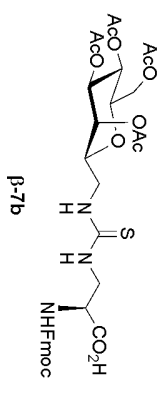

CDCl<sub>3</sub>, 300 MHz



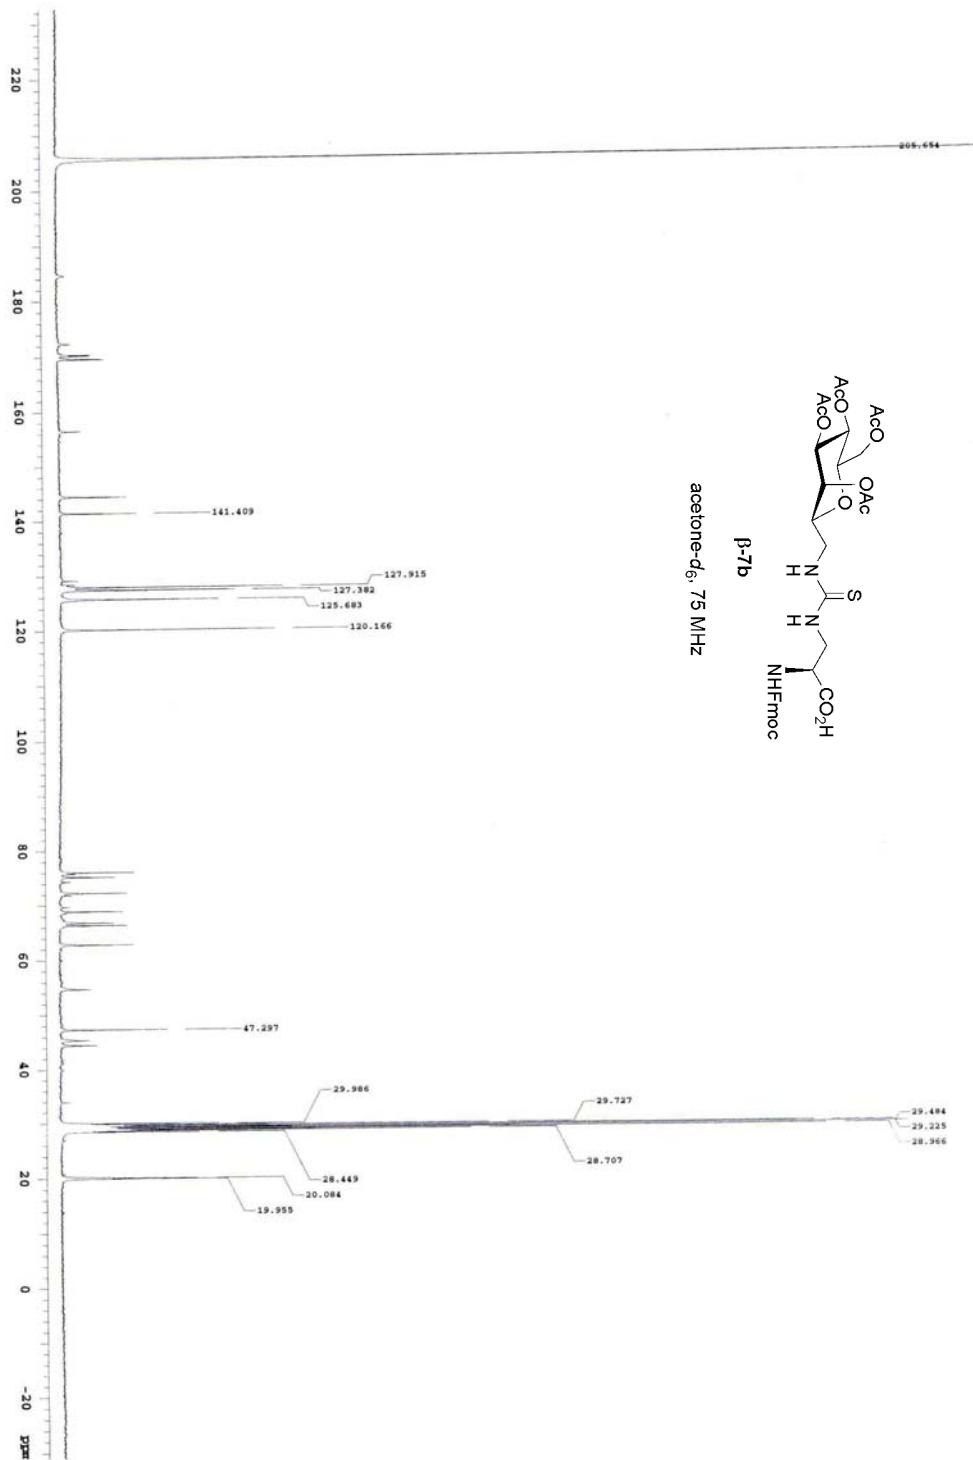

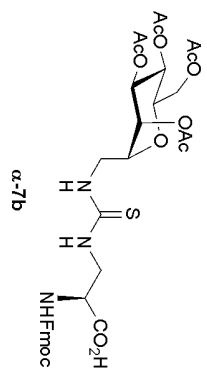

acetone-d<sub>6</sub>, 300 MHz

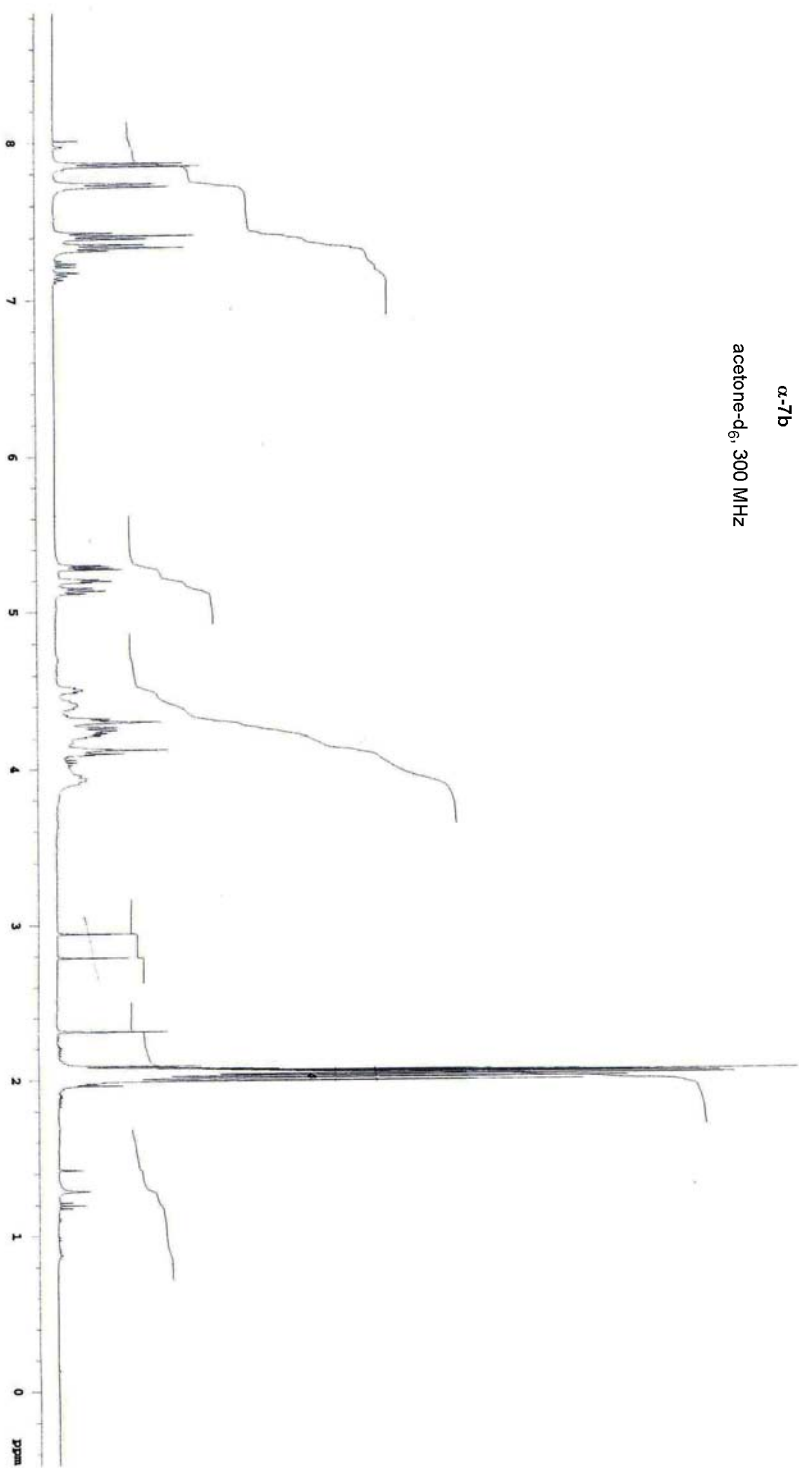

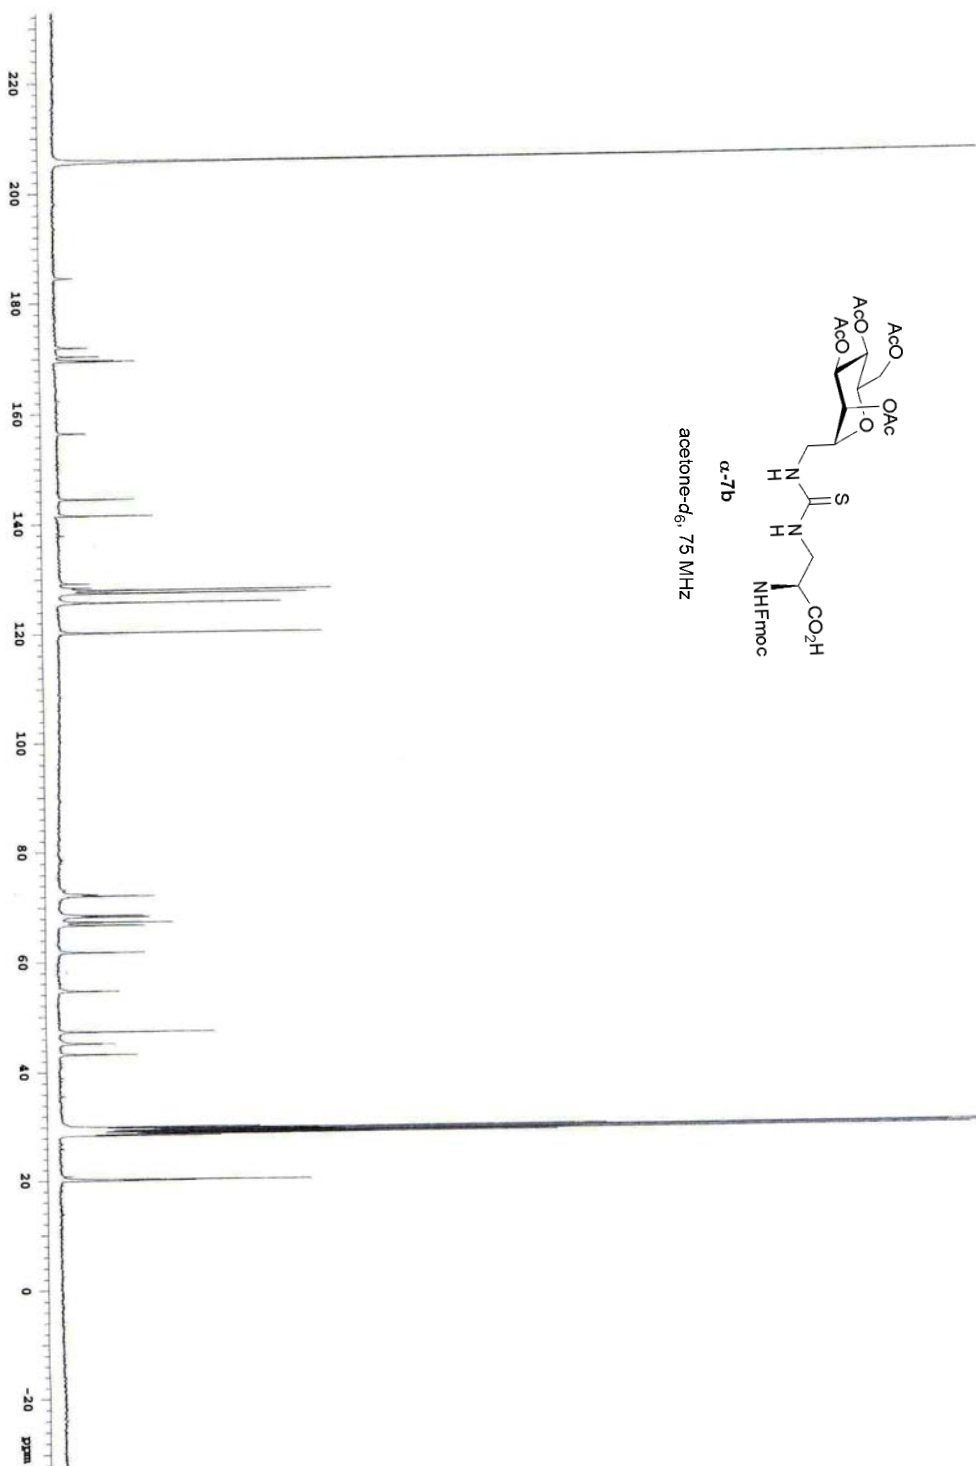

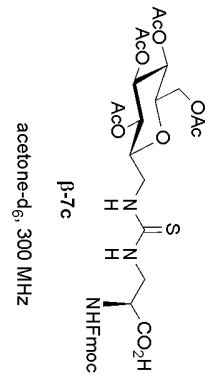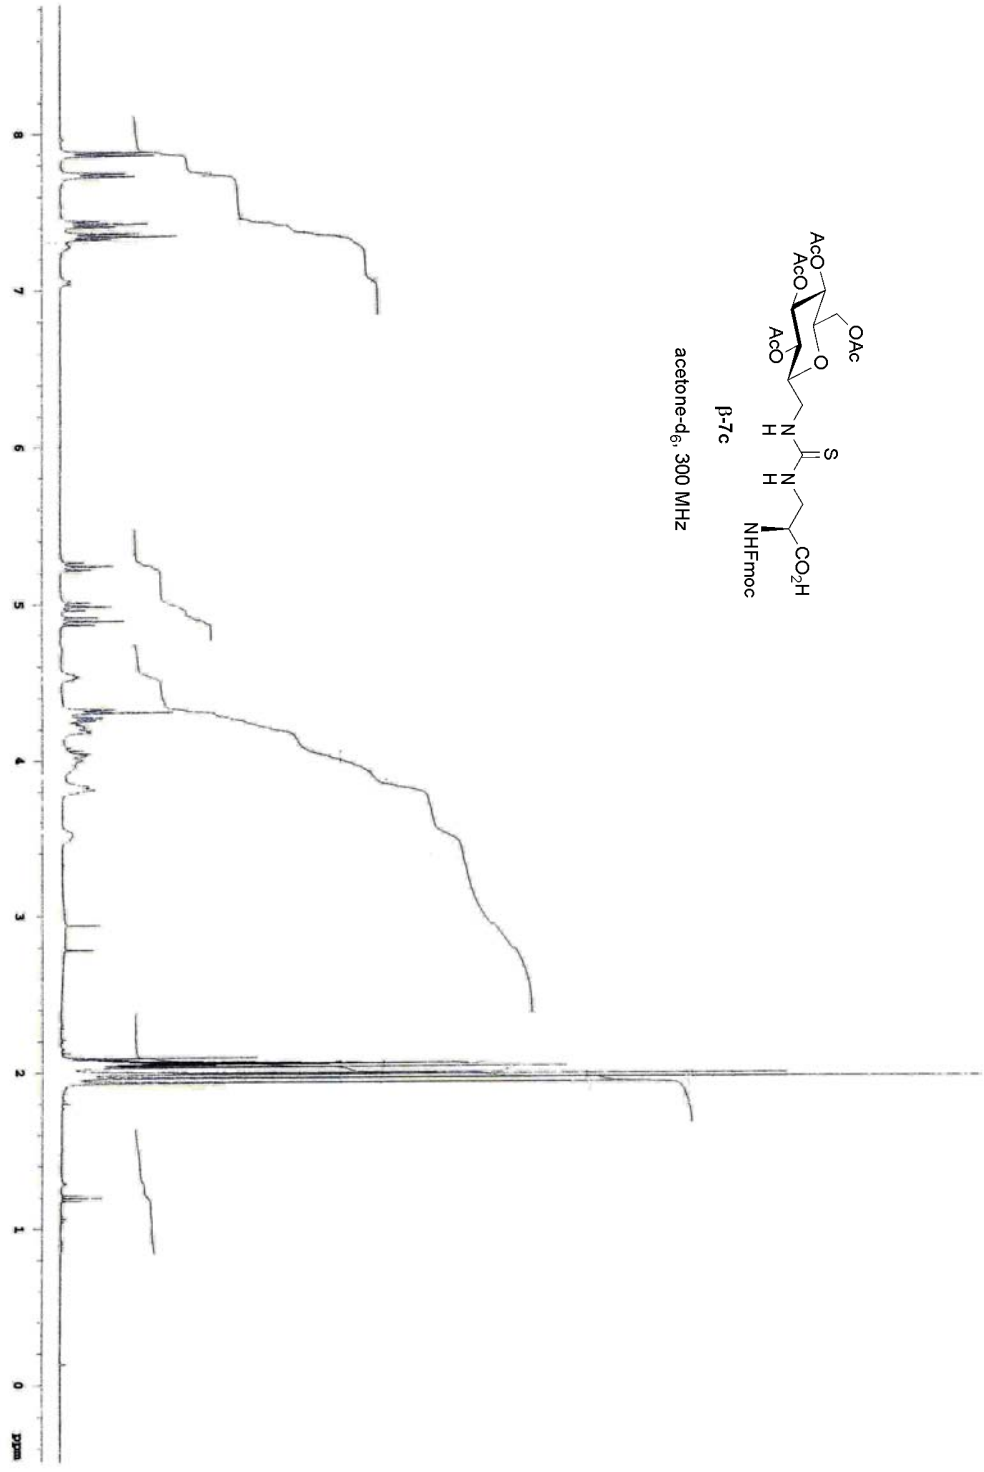

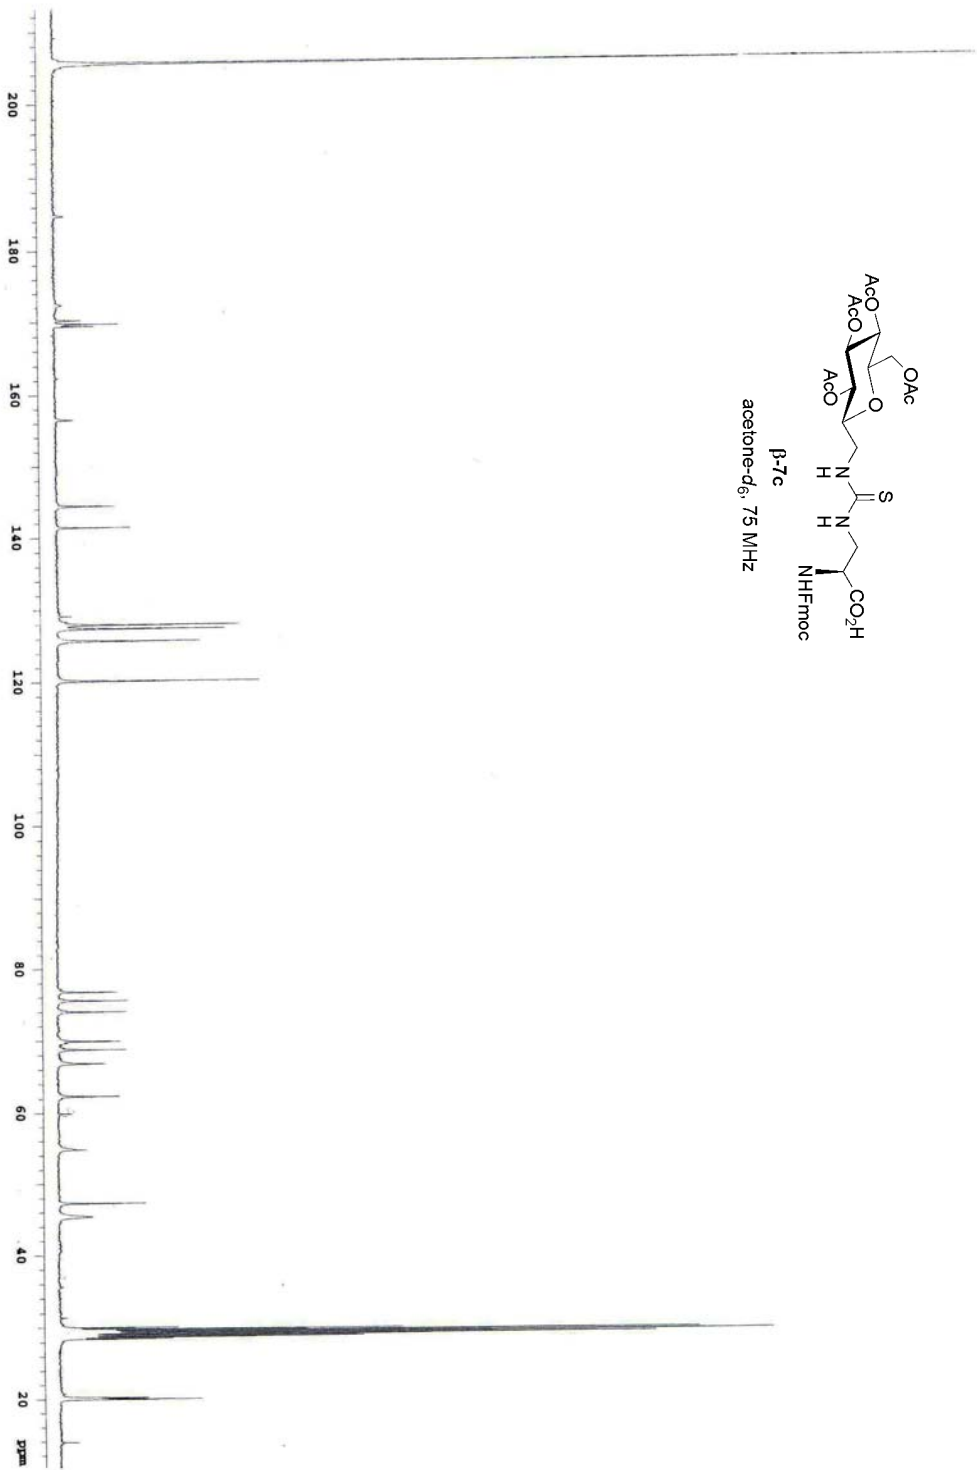

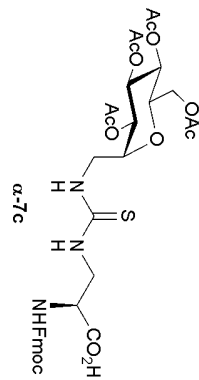

acetone-d<sub>6</sub>, 300 MHz

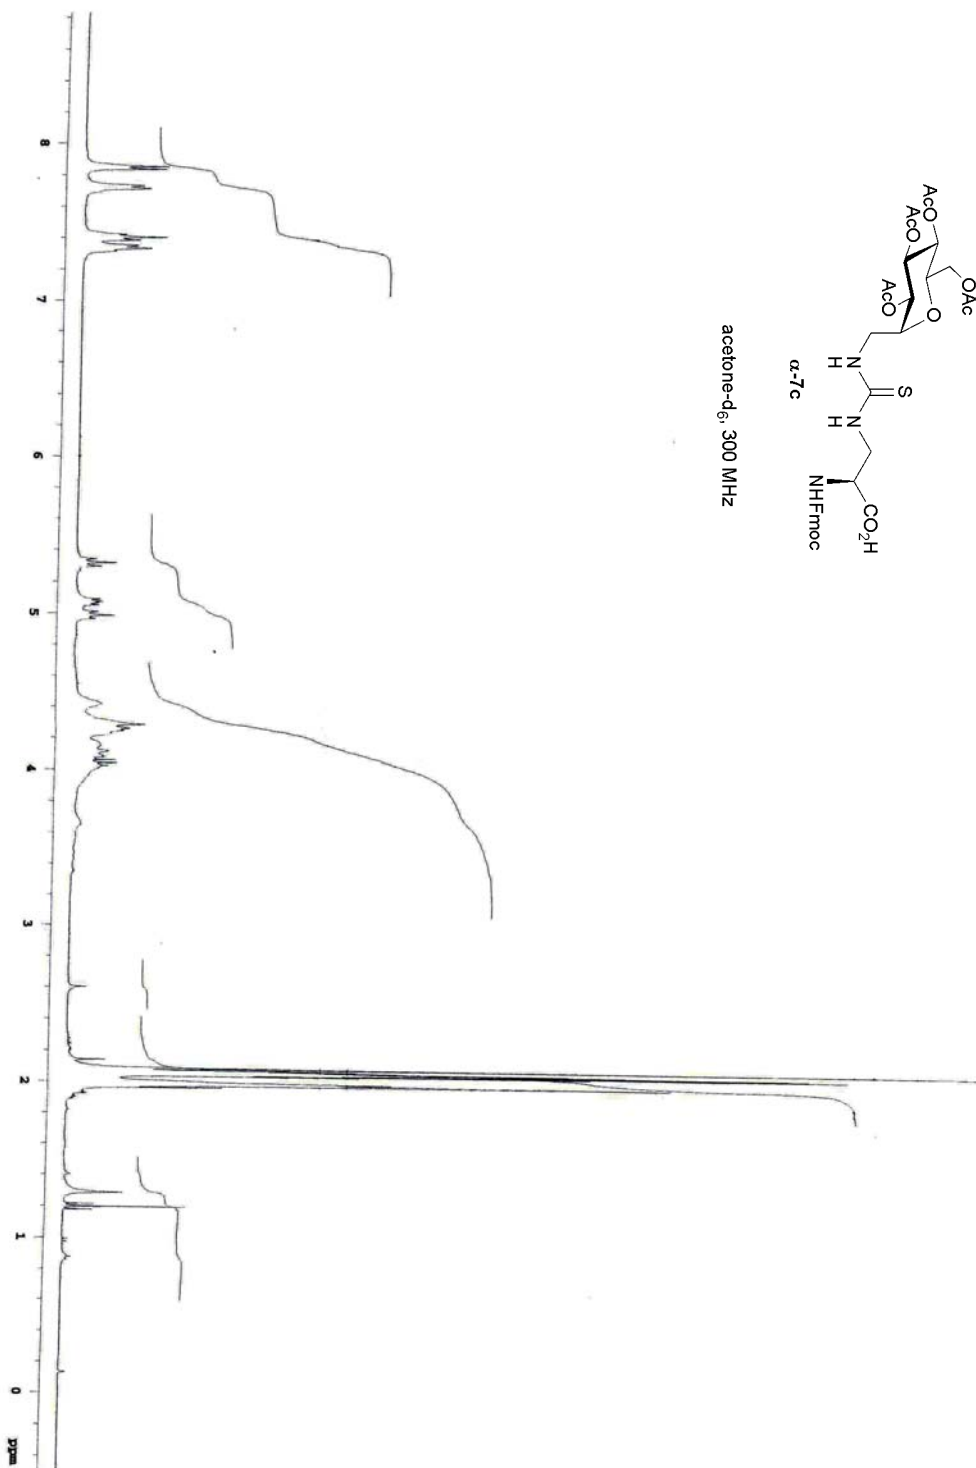

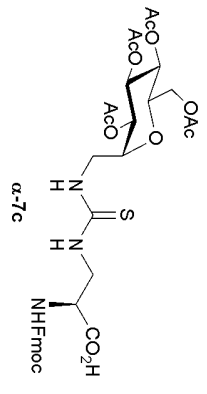

acetone-d<sub>6</sub>, 75 MHz

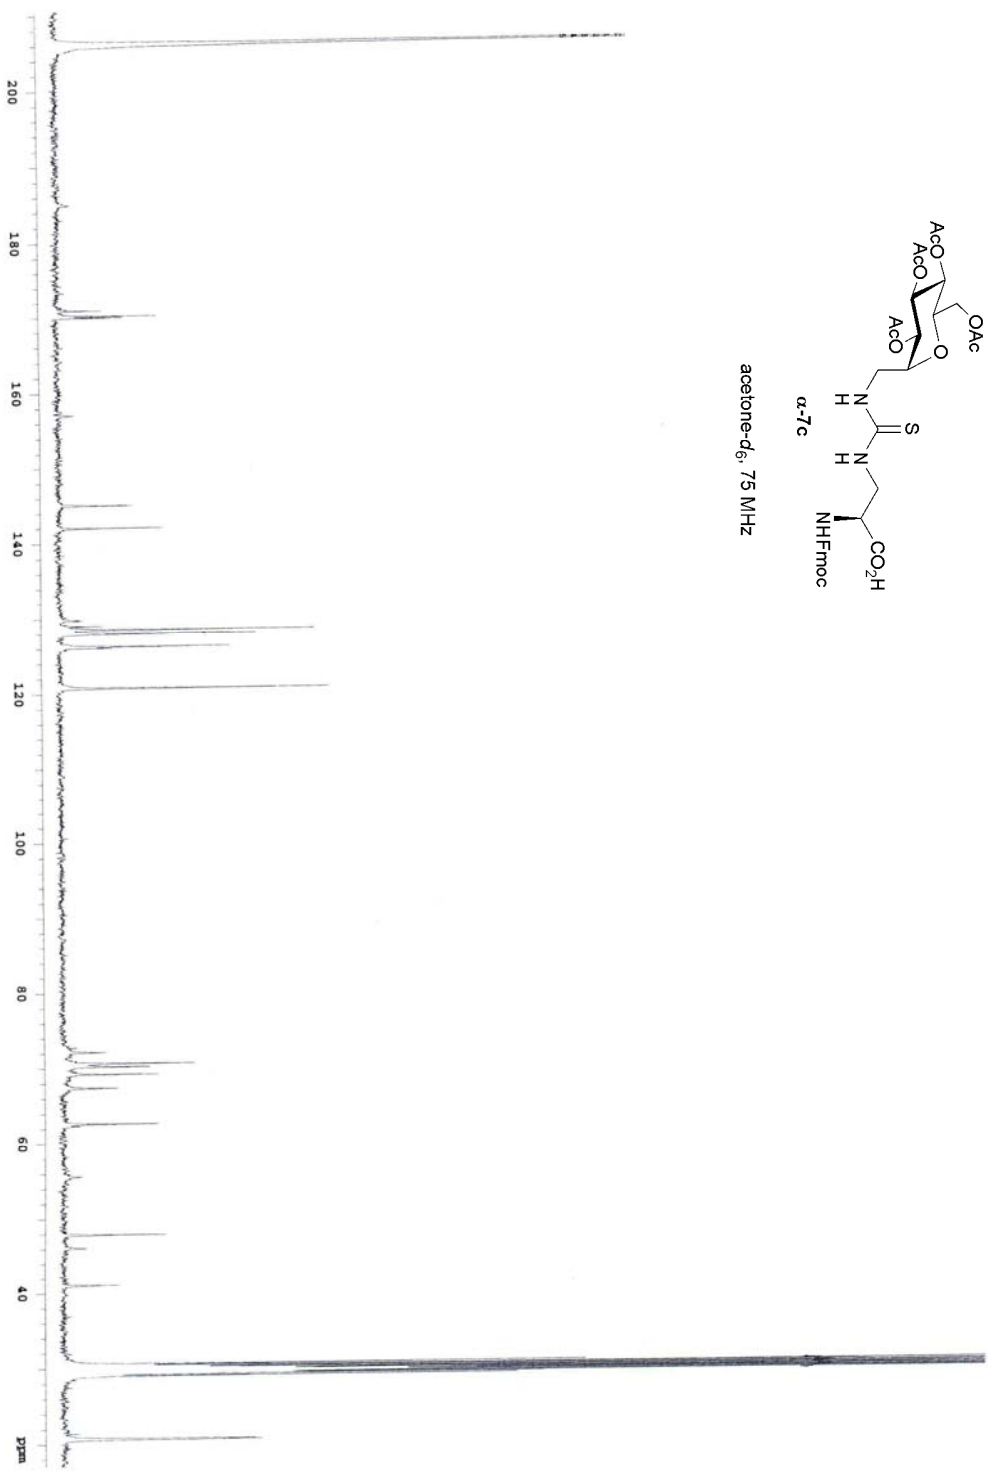

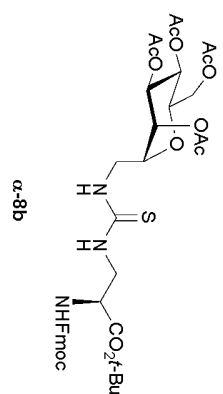

CDCl<sub>3</sub>, 300 MHz

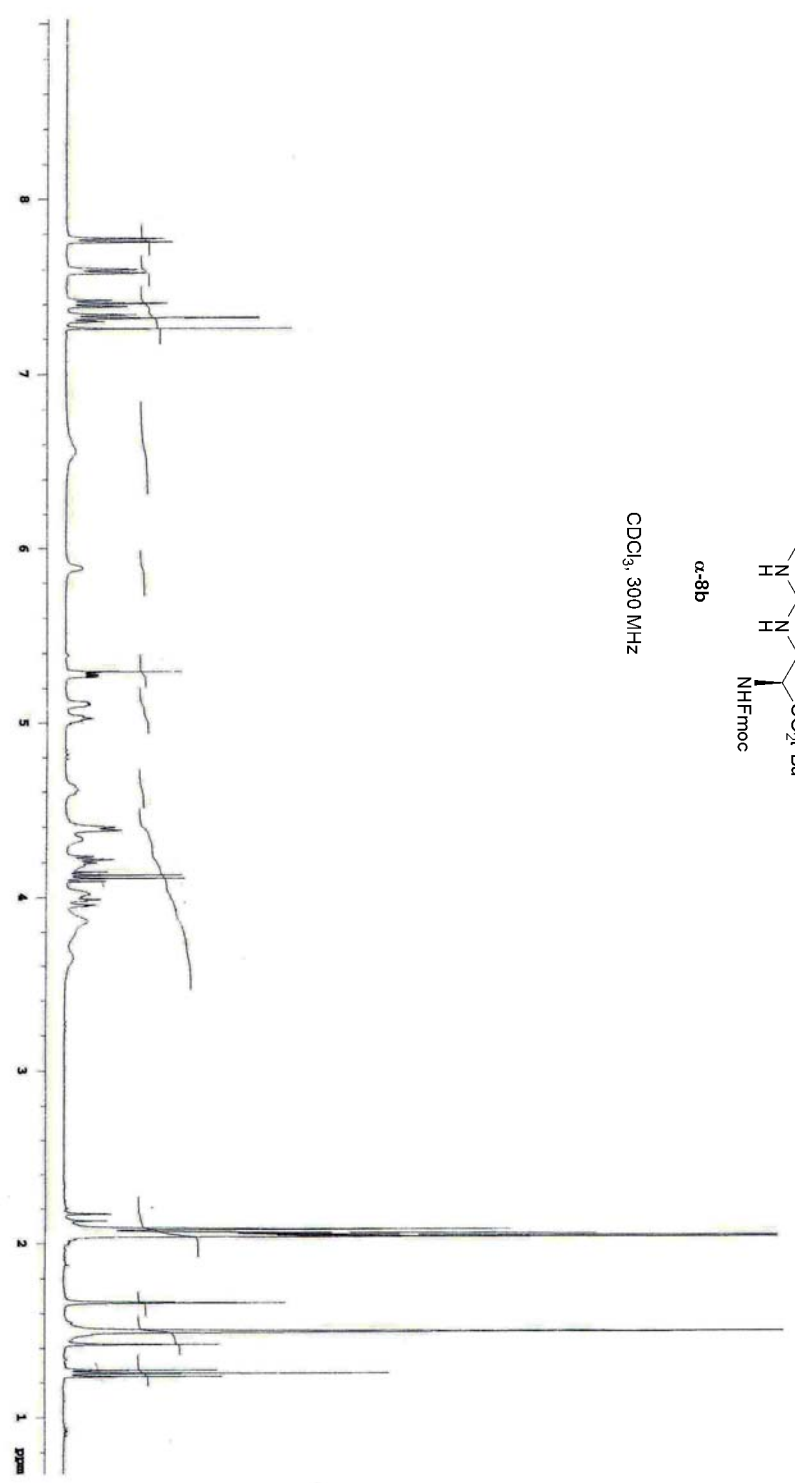



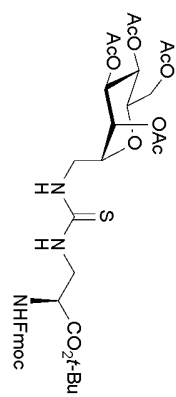

$\alpha$ -8b  
CDCl<sub>3</sub>, 75 MHz

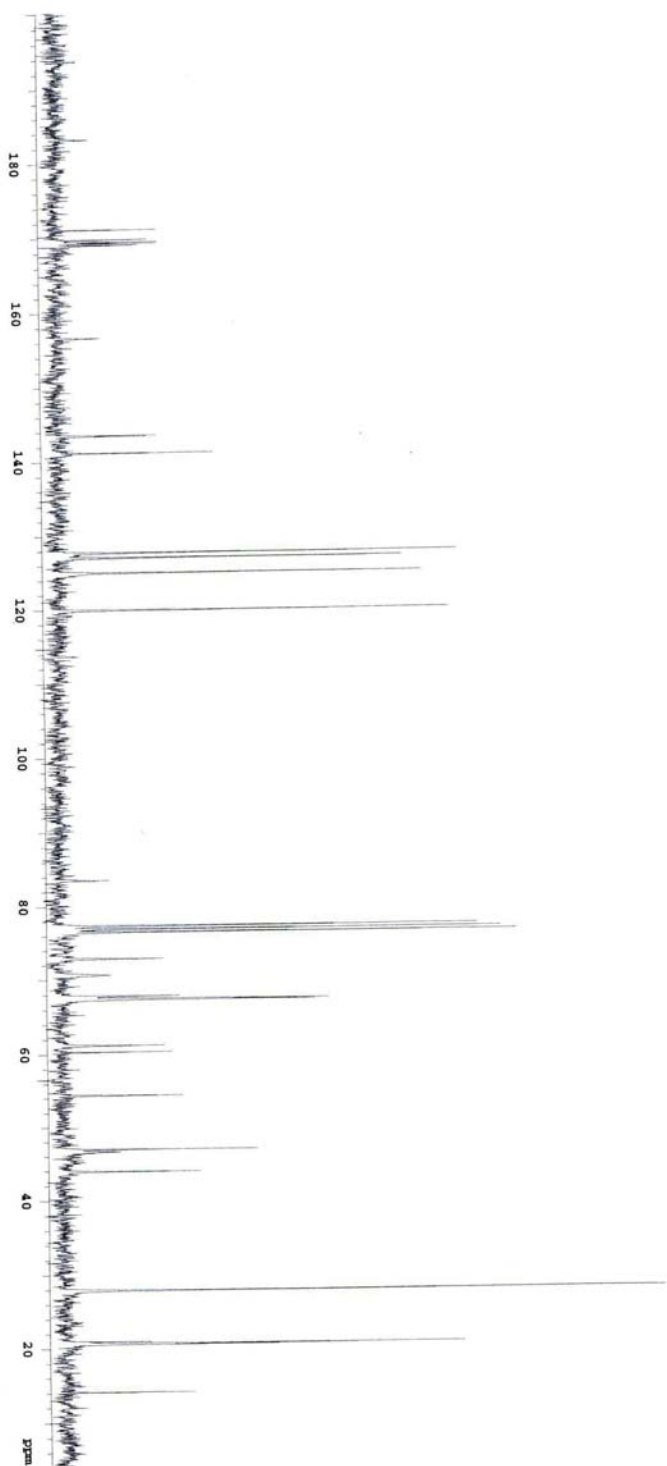

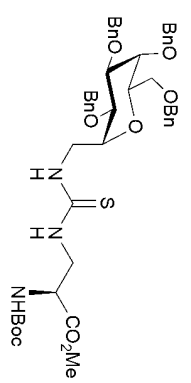

$\alpha$ -18a Me ester

$\text{CDCl}_3$ , 300 MHz

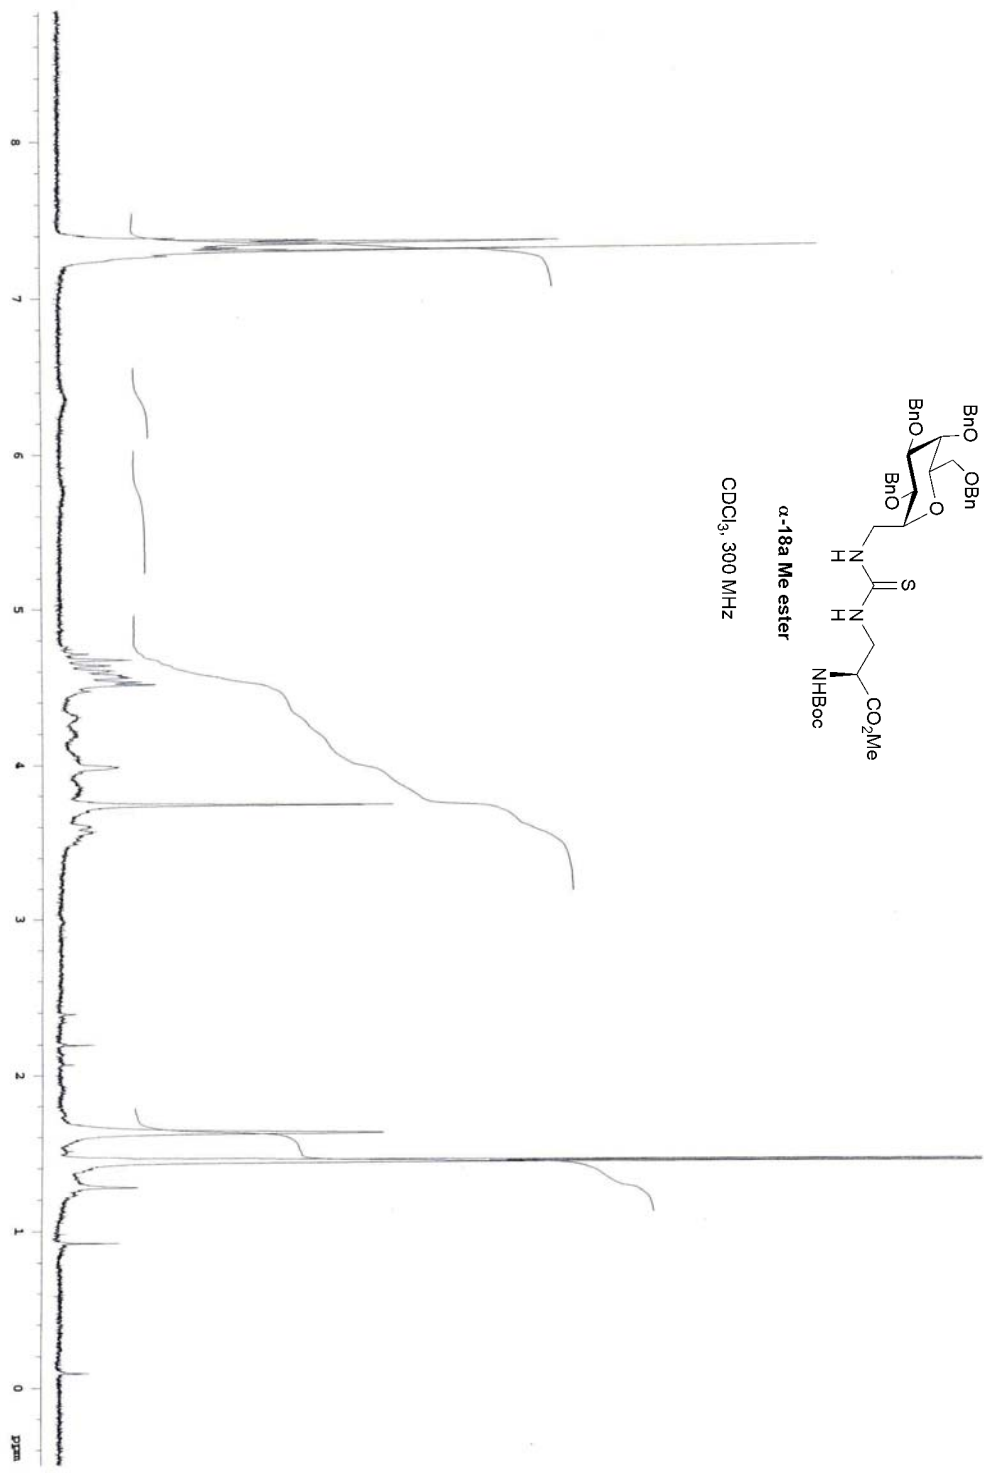

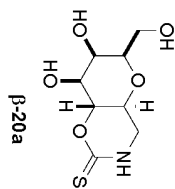

D<sub>2</sub>O, 300 MHz

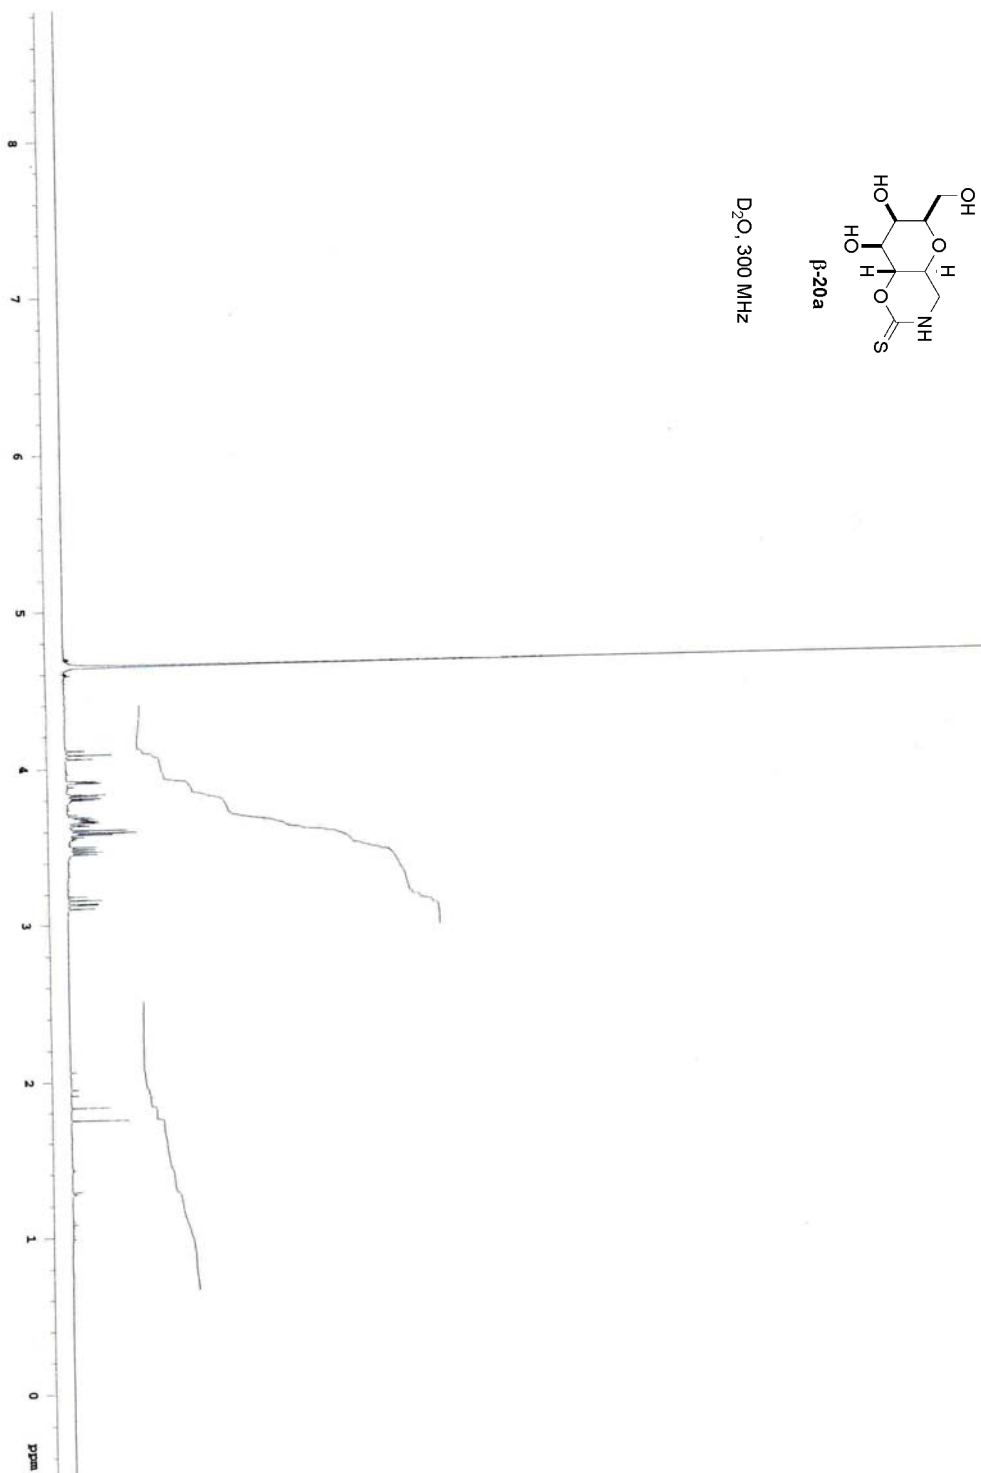

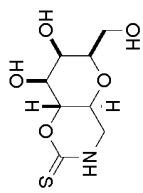

$\beta$ -20a

D<sub>2</sub>O, 75 MHz

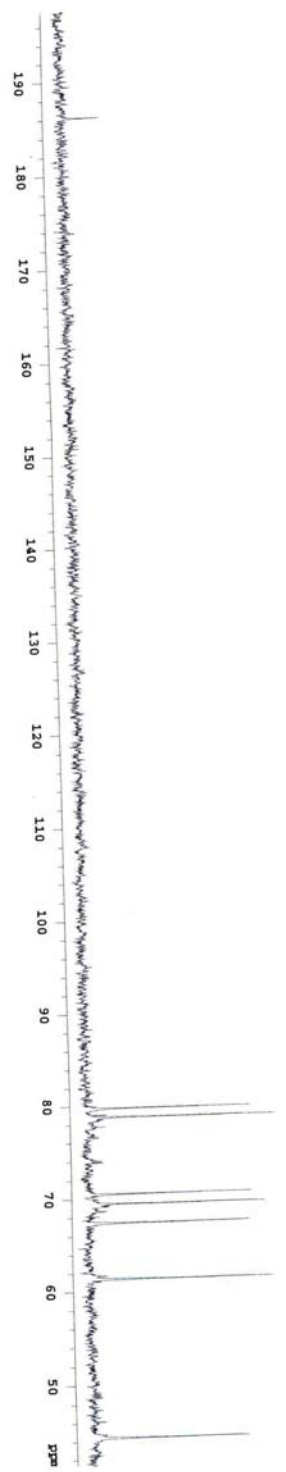

Supplement: b908156a.pdf [file b908156a.pdf]
